# Supplementary material
Source: PubMed Central journal article supplement (PMC7478164)
Supplement: MD-010-C9MD00365G-s001.pdf [file MD-010-C9MD00365G-s001.pdf]

Supplementary information

## **A focused structure-activity relationship study of psoralen-based immunoproteasome inhibitors**

Eva Shannon Schiffrer<sup>1</sup>, Izidor Sosič<sup>1</sup>, Andrej Šterman<sup>1</sup>, Janez Mravljak<sup>1</sup>, Irena  
Mlinarič Raščan<sup>2</sup>, Stanislav Gobec<sup>1</sup>, Martina Gobec<sup>2,\*</sup>

<sup>1</sup> University of Ljubljana, Faculty of Pharmacy, Chair of Pharmaceutical  
Chemistry, Aškerčeva 7, 1000 Ljubljana

<sup>2</sup> University of Ljubljana, Faculty of Pharmacy, Chair of Clinical Biochemistry,  
Aškerčeva 7, 1000 Ljubljana

# Table of Contents

|                                                                                                   |    |
|---------------------------------------------------------------------------------------------------|----|
| 1. General chemistry methods .....                                                                | 3  |
| 2. Proteasome activity measurements.....                                                          | 4  |
| 2.1 Residual activity of $\beta$ 5c, $\beta$ 2c, $\beta$ 1c, $\beta$ 2i, and $\beta$ 1i.....      | 4  |
| 2.2 Determination of $IC_{50}$ values for inhibition of $\beta$ 5i .....                          | 4  |
| 2.3 Cell culture.....                                                                             | 4  |
| 2.4 Inhibition of chymotrypsin-like ( $\beta$ 5) activity in cell lysates .....                   | 5  |
| 2.5 Inhibition of 26S chymotrypsin-like ( $\beta$ 5) activity in intact cells .....               | 5  |
| 2.6 Cytokine secretion.....                                                                       | 5  |
| 3. Supplementary scheme.....                                                                      | 7  |
| 4. Supplementary tables.....                                                                      | 8  |
| 5. Spectroscopic analyses of remaining compounds.....                                             | 11 |
| 6. Selected $^1H$ and $^{13}C$ NMR spectra .....                                                  | 29 |
| 7. Selected HRMS spectra.....                                                                     | 37 |
| 8. Selected HPLC spectra .....                                                                    | 39 |
| 9. Parameters to evaluate pharmacokinetics and drug-likeness and predicted water solubility ..... | 41 |
| 10. References.....                                                                               | 50 |

## 1. General chemistry methods

Reagents and solvents were obtained from commercial sources (i.e., Acros Organics, Aldrich, TCI Europe, Merck, Alfa Aesar, Fluorochem). DPLG-3 was synthesized according to the literature procedure (E. S. Karreci, et al. Proc Natl Acad Sci USA, 2016, 113, E8425-E8432.) and as presented in Scheme S1. Solvents and chemicals were used as received. In specific cases, solvents were distilled before use. Reactions were monitored using analytical thin-layer chromatography plates (Merck 60 F254, 0.20 mm), and the components were visualized under UV light and/or through staining with the relevant reagent. Flash column chromatography was performed on Merck Silica Gel 60 (particle size 0.040-0.063 mm; Merck, Germany). Melting points were determined on a Reichelt hot-stage apparatus and are uncorrected.  $^1\text{H}$  and  $^{13}\text{C}$  NMR spectra were recorded on a Bruker Avance III 400 MHz spectrometer at 295 K. The chemical shifts ( $\delta$ ) are reported in parts per million (ppm) and are referenced to the deuterated solvent used. The coupling constants ( $J$ ) are given in Hz, and the splitting patterns are designated as follows: s, singlet; br s, broad singlet; d, doublet; dd, double doublet; t, triplet; app q, apparent quartet; dq, doublet of quartets; m, multiplet. Reactions using microwaves were performed on a standard monomode microwave reactor MONOWAVE 200 (Anton Paar). Mass spectra data and high-resolution mass measurements were performed on a VG-Analytical Autospec Q mass spectrometer at the Jožef Stefan Institute, Ljubljana, Slovenia, and on a Thermo Scientific Q Exactive Plus mass spectrometer at the Faculty of Pharmacy, University of Ljubljana. Elemental analyses were performed on a 240 C Perkin-Elmer C, H, N analyzer. Analytical normal-phase HPLC for the test compounds was performed on an Agilent 1100 LC modular system that was equipped with a photodiode array detector set to 254 nm. A Kromasil 3-CelluCoat column (150  $\times$  4.6 mm) was used, with a flow rate of 1.0 mL/min and a sample injection volume of 10  $\mu\text{L}$ . An eluent system of A (hexane) and B (isopropanol) was used according to the general method of: 0-18 min, 80% A). The purities of the test compounds used for the biological evaluations were  $\geq 95\%$ , as determined by HPLC.

## **2. Proteasome activity measurements**

### **2.1 Residual activity of $\beta$ 5c, $\beta$ 2c, $\beta$ 1c, $\beta$ 2i, and $\beta$ 1i**

The residual activity determination was performed at 10  $\mu$ M final concentrations. To 50  $\mu$ L of the desired compound, 25  $\mu$ L 0.8 nM human iCP (Boston Biochem, Inc., Cambridge/MA, USA) was added. After 30 min of incubation at 37 °C, the reaction was initiated by the addition of the relevant fluorescent substrate: Suc-LLVY-AMC for  $\beta$ 5c, Boc-LRR-AMC for  $\beta$ 2i and  $\beta$ 2c, Z-LLE-AMC for  $\beta$ 1c (all from Bachem, Bubendorf, Switzerland), and Ac-PAL-AMC for  $\beta$ 1i (Boston Biochem, Inc., Cambridge/MA, USA). The fluorescence was monitored at 460 nm ( $\lambda_{\text{ex}} = 360$  nm) for 120 min at 37 °C. The initial linear ranges were used to calculate the velocity and to determine the residual activity.

### **2.2 Determination of IC<sub>50</sub> values for inhibition of $\beta$ 5i**

The final assay mixtures contained 0.2 nM human iCP (Boston Biochem, Inc., Cambridge/MA, USA) in assay buffer (0.01% SDS, 50 mM Tris-HCl, 0.5 mM EDTA, pH 7.4). Inhibitors were dissolved in DMSO and added to black 96-well plates for at least eight different concentrations (the final concentration of DMSO did not exceed 1%). After 30 min of incubation at 37 °C, the reaction was initiated by the addition of the Suc-LLVY-AMC (Bachem, Bubendorf, Switzerland). The fluorescence was monitored at 460 nm ( $\lambda_{\text{ex}} = 360$  nm) for 120 min at 37 °C. The progress of the reactions was recorded and the initial linear ranges were used to calculate the velocity. IC<sub>50</sub> values were calculated in Prism (GraphPad Software, CA, USA) and are means from at least three independent determinations.

### **2.3 Cell culture**

HeLa cells (ATCC, LGC Standards, UK) were cultured in Dulbecco's modified Eagle's Medium (Sigma-Aldrich, St. Louis, MO, USA) supplemented with 10% fetal bovine serum, 2 mM L-glutamine, 100 U/mL penicillin, and 100  $\mu$ g/mL streptomycin (all from Sigma-Aldrich). THP-1 cells (ATCC) were cultured in RPMI 1640 medium (Sigma-Aldrich) supplemented with 10% fetal bovine serum (Gibco, Grand Island, NY, USA), 2 mM L-glutamine, 100 U/mL penicillin, 100  $\mu$ g/mL streptomycin and 50  $\mu$ M 2-mercaptoethanol. Cells were maintained in a humidified chamber at 37 °C and 5% CO<sub>2</sub>.

#### **2.4 Inhibition of chymotrypsin-like ( $\beta$ 5) activity in cell lysates**

THP-1 or HeLa cells ( $5 \times 10^6$ ) were lysed with ice-cold 5 mM EDTA (pH 8.0). The suspensions were frozen at  $-80^\circ\text{C}$  for 15 min, thawed on ice, and this cycle was repeated three times. Centrifugation at  $10,000\times g$  for 10 min followed. Afterwards, the supernatants were collected and the protein concentrations were determined using the DC™ Protein Assay (BioRad Laboratories, CA, USA). Then 10  $\mu\text{g}$  of extracted protein was incubated with different concentrations of the compound of interest in the assay buffer (50 mM Tris-HCl, 0.5 mM EDTA, pH 7.4) with 6 nM PA28 $\alpha$  (Boston Biochem Inc., Cambridge/MA, USA) for 30 min at  $37^\circ\text{C}$ . The reactions were initiated by adding 15  $\mu\text{M}$  Ac-ANW-AMC (Boston Biochem) for  $\beta$ 5i, or 100  $\mu\text{M}$  Suc-LLVY-AMC for total  $\beta$ 5 activities. The fluorescence was measured on a BioTek Synergy HT microplate reader for 90 min at  $37^\circ\text{C}$ . IC<sub>50</sub> values were calculated using Prism software (GraphPad Software) and are means from at least three independent determinations.

#### **2.5 Inhibition of 26S chymotrypsin-like ( $\beta$ 5) activity in intact cells**

THP-1 and HeLa cells were plated in 96-well plates ( $2 \times 10^5$  cells/mL) and incubated with the compound of interest at the indicated concentrations for 2 h at  $37^\circ\text{C}$ . The activity of the 26S proteasome activity was measured *in situ* by monitoring hydrolysis of the  $\beta$ 5 substrate Suc-LLVY-aminoluciferin in the presence of luciferase using the Proteasome-Glo™ assay reagents (Promega, WI, USA), according to the manufacturer instructions. The luminescence was measured using a BioTek Synergy HT microplate reader. RA values are means from at least three independent determinations.

#### **2.6 Cytokine secretion**

Human PBMC from healthy blood donors were isolated by density gradient centrifugation with Ficoll-Paque (Pharmacia, Sweden). The cells were cultured in RPMI 1640 (Sigma, Germany) supplemented with 100 U/mL penicillin (Sigma), 100  $\mu\text{g}/\text{mL}$  streptomycin (Sigma), 2 mM L-glutamine (Sigma), 50  $\mu\text{M}$  2-mercaptoethanol (Sigma) and 10% heat-inactivated foetal bovine serum (Gibco, USA).  $1 \times 10^6$  cells were plated on 48-well culture treated with selected compounds or medium alone for 1 h, followed by 24 h stimulation with 10 ng/mL LPS (*E. coli* O111:B4, Sigma). Cells were incubated at  $37^\circ\text{C}$  in a humidified atmosphere of 5% CO<sub>2</sub> in air. The cell-free supernatants were collected and the cytokine production was assessed by BD Cytometric Bead Array (CBA) Human Inflammatory Cytokine Kit (Content: IL-

6, IL-10, TNF- $\alpha$ , IL-8, IL12p70, IL-1 $\beta$ ). Analysis was performed using Attune<sup>®</sup> NxT Acoustic Focusing Flow Cytometer (Thermo Fisher Scientific, USA). The data were analysed with FlowJo software (Tree Star, Inc., Ashland, OR). Results are expressed relative to LPS treated cells. The results are expressed as means of duplicates  $\pm$  SEM of two independent experiments.

## **2.7 Rapid Dilution Assay**

The iCP at 100-fold final concentration (20 nM) was incubated with inhibitors **42**, **44**, **47**, or **DPLG-3** at a concentration of 10-fold the IC<sub>50</sub>, for 0 or 30 min at room temperature (volume, 2  $\mu$ L). This mixture was diluted 100-fold with the substrate (25  $\mu$ M Suc-LLVY-AMC) to a final volume of 200  $\mu$ L. In the case of reversibility of the inhibitor, the recovery of the enzyme activity is expected to be more than 90%.

### 3. Supplementary scheme

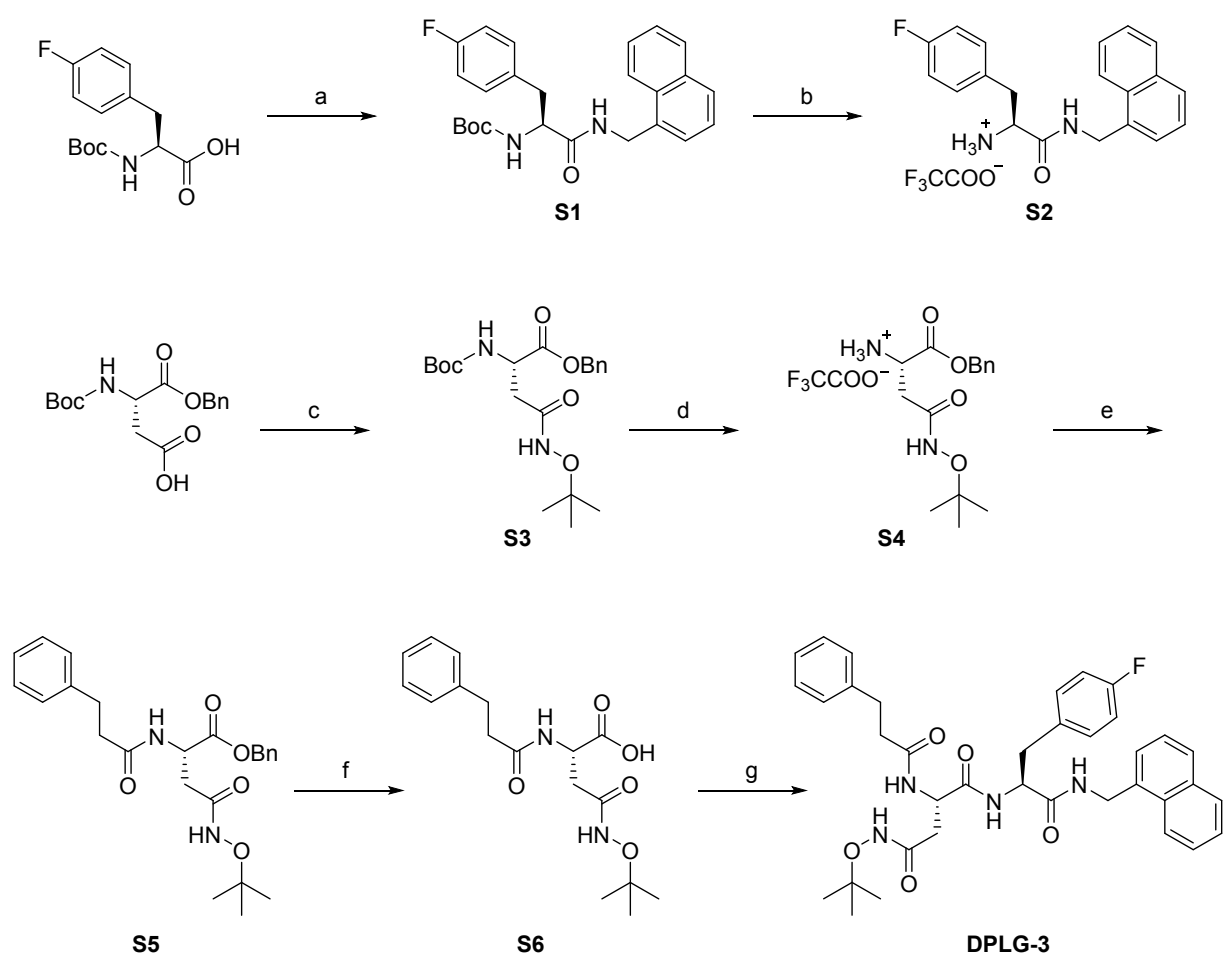

Scheme S1: Synthesis of DPLG-3

Reagents and conditions: (a) 1-naphthylmethanamine, HATU, HOBT, DIPEA, DMF, 0 °C, 90 min; (b) TFA, CH<sub>2</sub>Cl<sub>2</sub>, 0 °C to rt, 20 h; (c) O-(*tert*-butyl)hydroxylammonium chloride, HATU, HOBT, DIPEA, DMF, 0 °C, 90 min; (d) TFA, CH<sub>2</sub>Cl<sub>2</sub>, 2 h; (e) 3-phenylpropionic acid, HATU, HOBT, DIPEA, DMF, 0 °C, 90 min, then rt 18 h; (f) H<sub>2</sub>, Pd-C, MeOH, rt, 2 h; (g) **S2**, HATU, HOBT, DIPEA, DMF, 0 °C to rt, 16 h.

#### 4. Supplementary tables

**Table S1.** Residual activities (%) of the other catalytically active subunits of iCP ( $\beta$ 2i,  $\beta$ 1i) and cCP ( $\beta$ 5c,  $\beta$ 2c and  $\beta$ 1c) in the presence of 10  $\mu$ M compound.

| Cpd       | $\beta$ 2i  | $\beta$ 1i   | $\beta$ 5c   | $\beta$ 2c  | $\beta$ 1c  |
|-----------|-------------|--------------|--------------|-------------|-------------|
|           | Boc-LRR-AMC | Ac-PAL-AMC   | Suc-LLVY-AMC | Boc-LRR-AMC | Z-LLE-AMC   |
| <b>38</b> | 69 $\pm$ 6  | 54 $\pm$ 1   | 84 $\pm$ 9   | 74 $\pm$ 3  | 82 $\pm$ 3  |
| <b>39</b> | 117 $\pm$ 3 | 66 $\pm$ 3   | 97 $\pm$ 5   | 77 $\pm$ 5  | 101 $\pm$ 4 |
| <b>40</b> | 39 $\pm$ 12 | 60 $\pm$ 1   | 90 $\pm$ 8   | 53 $\pm$ 2  | 87 $\pm$ 4  |
| <b>41</b> | 60 $\pm$ 6  | 47 $\pm$ 4   | 82 $\pm$ 16  | 66 $\pm$ 4  | 83 $\pm$ 3  |
| <b>42</b> | 105 $\pm$ 5 | 102 $\pm$ 8  | 69           | 72 $\pm$ 13 | 77 $\pm$ 9  |
| <b>43</b> | 21 $\pm$ 7  | 96 $\pm$ 9   | 84           | 27 $\pm$ 1  | 87 $\pm$ 11 |
| <b>44</b> | 76 $\pm$ 5  | 116 $\pm$ 10 | 100          | 40 $\pm$ 1  | 89 $\pm$ 16 |
| <b>45</b> | 29 $\pm$ 5  | 44 $\pm$ 6   | 77 $\pm$ 9   | 67 $\pm$ 7  | 102 $\pm$ 1 |
| <b>46</b> | 37 $\pm$ 10 | 21 $\pm$ 9   | 72 $\pm$ 7   | 57 $\pm$ 1  | 83 $\pm$ 9  |
| <b>47</b> | 67 $\pm$ 7  | 108 $\pm$ 3  | 82 $\pm$ 5   | 68 $\pm$ 11 | 90 $\pm$ 3  |

Suc-LLVY-AMC, succinyl-Leu-Leu-Val-Tyr-7-amino-4-methylcoumarin; Boc-LRR-AMC, *t*-butyloxycarbonyl-Leu-Arg-Arg-7-amino-4-methylcoumarin; Ac-PAL-AMC, acetyl-Pro-Ala-Leu-7-amino-4-methylcoumarin; Z-LLE-AMC, benzyloxycarbonyl-Leu-Leu-Glu-7-amino-4-methylcoumarin.



**Table S2.** Cell-based IC<sub>50</sub> or RA (%) values against β5 activity in THP-1 and HeLa cells and lysates. The provided data is from three independent biological repeats given as a mean value with S.E.M.

| Compound  | RA (%)      | RA (%)     | IC <sub>50</sub>      | RA (%)               |
|-----------|-------------|------------|-----------------------|----------------------|
|           | THP-1 cells | HeLa cells | THP-1 lysates<br>(μM) | HeLa lysates         |
| <b>44</b> | 74 ± 8      | 101 ± 7    | 1.53 ± 0.37           | 68 ± 4 <sup>a</sup>  |
| <b>47</b> | 65 ± 10     | 98 ± 16    | 1.01 ± 0.07           | 99 ± 11 <sup>a</sup> |

<sup>a</sup> IC<sub>50</sub> values could not be determined due to solubility problems, thus the RA (%) values are provided at 25 μM concentration for both compounds.

**Table S3.** Determination of the IC<sub>50</sub> shift for compounds **42**, **44**, and **47** for the inhibition of β5i activity without or with 30 min pre-incubation.

| Pre-incubation<br>(min) | Compound IC <sub>50</sub> (nM) <sup>[a]</sup> |           |           |
|-------------------------|-----------------------------------------------|-----------|-----------|
|                         | <b>42</b>                                     | <b>44</b> | <b>47</b> |
| 0                       | 1300±200                                      | 1500±150  | 2100±200  |
| 30                      | 141±6                                         | 174±5     | 106±4     |

<sup>a</sup> IC<sub>50</sub> values are means from at least three independent determinations.

**Table S4.** Determination of the recovery of β5i activity after 30 min incubation with 10-fold IC<sub>50</sub> concentrations of **42**, **44**, **47**, and **DPLG-3** followed by a 100-fold dilution with substrate.

| Compound     | <b>42</b> | <b>44</b> | <b>47</b> | <b>DPLG-3</b> |
|--------------|-----------|-----------|-----------|---------------|
| Recovery (%) | 29        | 32        | 22        | 93            |

**Table S5.** The effect of compounds **44**, **47**, **DPLG-3** and **PR-957** on the secretion of cytokines in PBMCs. The results present a relative value to LPS treated cells. The cells were pre-treated for 1 h with either **DPLG-3** (50 nM), **44** (10  $\mu$ M), **47** (10  $\mu$ M) or **PR-957** (50 nM). Afterwards, 10 ng/mL LPS was added and the concentrations of cytokines were determined in the supernatants after additional 24 h treatment. The results are expressed as means of duplicates  $\pm$  SEM of at least three independent experiments.

| Cytokine<br>(% of LPS)        | Compound                 |                           |                           |                          |
|-------------------------------|--------------------------|---------------------------|---------------------------|--------------------------|
|                               | <b>DPLG-3</b><br>(50 nM) | <b>44</b><br>(10 $\mu$ M) | <b>47</b><br>(10 $\mu$ M) | <b>PR-957</b><br>(50 nM) |
| <b>IL-12p70</b>               | 101 $\pm$ 6              | 91 $\pm$ 0                | 98 $\pm$ 4                | 96 $\pm$ 6               |
| <b>TNF<math>\alpha</math></b> | 95 $\pm$ 11              | 93 $\pm$ 5                | 104 $\pm$ 19              | 72 $\pm$ 9               |
| <b>IL-10</b>                  | 73 $\pm$ 3               | 77 $\pm$ 8                | 65 $\pm$ 16               | 25 $\pm$ 7               |
| <b>IL-6</b>                   | 78 $\pm$ 9               | 79 $\pm$ 11               | 89 $\pm$ 2                | 62 $\pm$ 14              |
| <b>IL-1<math>\beta</math></b> | 108 $\pm$ 3              | 123 $\pm$ 8               | 98 $\pm$ 19               | 510 $\pm$ 89             |
| <b>IL-8</b>                   | 99 $\pm$ 3               | 97 $\pm$ 9                | 95 $\pm$ 15               | 98 $\pm$ 13              |

## 5. Spectroscopic analyses of remaining compounds

### 2-Bromo-1-(thiophen-2-yl)ethan-1-one 2

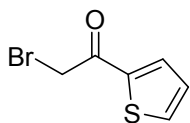

Brown oil; yield 100% (crude, unpurified product); <sup>1</sup>H NMR (400 MHz, DMSO-*d*<sub>6</sub>) δ 4.67 (s, 2H, CH<sub>2</sub>), 7.25 (t, *J* = 3.8 Hz, 1H, Ar-H), 7.96 (dd, *J*<sub>1</sub> = 8.9 Hz, *J*<sub>2</sub> = 3.8 Hz, 1H, Ar-H), 8.02 (dd, *J* = 8.9 Hz, 3.8 Hz, 1H, Ar-H). HRMS (*m/z*) (ESI): calcd for C<sub>6</sub>H<sub>5</sub>BrOS [M+H]<sup>+</sup>: 204.9323, found: 204.9326.

### 2-Bromo-1-(*m*-tolyl)ethan-1-one 3

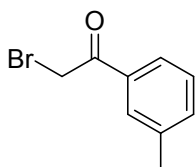

Green oil; yield 81% (crude, unpurified product); <sup>1</sup>H NMR (400 MHz, DMSO-*d*<sub>6</sub>) δ 2.40 (s, 3H, CH<sub>3</sub>), 4.93 (s, 2H, CH<sub>2</sub>), 7.42-7.52 (m, 2H, Ar-H), 7.76-7.83 (m, 2H, Ar-H). HRMS (*m/z*) (ESI): calcd for C<sub>9</sub>H<sub>9</sub>BrO [M+H]<sup>+</sup>: 212.9915, found: 212.9913.

### 2-Bromo-1-cyclobutylethan-1-one 5

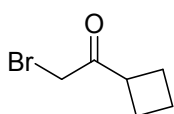

Brown liquid; yield 100 % (crude, unpurified product); <sup>1</sup>H NMR (400 MHz, DMSO-*d*<sub>6</sub>) δ 1.50-1.92 (m, 4H, cyclobutyl-CH<sub>2</sub>), 2.20-2.30 (m, 2H, cyclobutyl-CH<sub>2</sub>), 2.92-3.00 (m, 1H, CH), 4.45 (s, 2H, CH<sub>2</sub>).

### 2-Bromo-1-cyclopentylethan-1-one 6

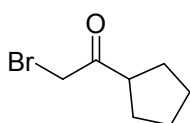

Yellow liquid; yield 87 % (crude, unpurified product);  $^1\text{H}$  NMR (400 MHz,  $\text{DMSO-}d_6$ )  $\delta$  1.67-1.84 (m, 8H, cyclopentyl- $\text{CH}_2$ ), 2.30-2.35 (m, 1H,  $\text{CH}$ ), 4.33 (s, 2H,  $\text{CH}_2$ ).

#### Ethyl 7-(2-(2-methoxyphenyl)-2-oxoethoxy)-4-methyl-2-oxo-2H-chromene-3-carboxylate 8

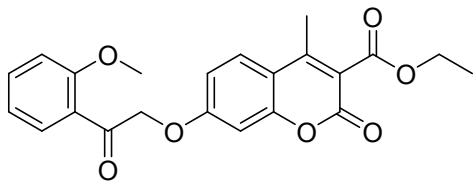

Off-white solid; yield 100%;  $^1\text{H}$  NMR (400 MHz,  $\text{DMSO-}d_6$ )  $\delta$  1.30 (t,  $J = 7.1$  Hz, 3H,  $\text{CH}_2\text{CH}_3$ ), 2.43 (s, 3H, Ar- $\text{CH}_3$ ), 3.98 (s, 3H,  $\text{OCH}_3$ ), 4.33 (q,  $J = 7.1$  Hz, 2H,  $\text{CH}_2\text{CH}_3$ ), 5.51 (s, 2H,  $\text{CH}_2$ ), 7.01-7.05 (m, 2H, Ar- $\text{H}$ ), 7.09-7.12 (m, 1H, Ar- $\text{H}$ ), 7.27 (d,  $J = 8.2$  Hz, 1H, Ar- $\text{H}$ ), 7.63-7.68 (m, 1H, Ar- $\text{H}$ ), 7.76 (dd,  $J = 7,7$  Hz, 1,8 Hz, 1H, Ar- $\text{H}$ ), 7.81 (d,  $J = 8,9$  Hz, 1H, Ar- $\text{H}$ ). HRMS ( $m/z$ ) (ESI): calcd for  $\text{C}_{22}\text{H}_{20}\text{O}_7$  [ $\text{M}+\text{H}$ ] $^+$ : 397.1287, found: 397.1281.

#### Ethyl 7-(2-(3-methoxyphenyl)-2-oxoethoxy)-4-methyl-2-oxo-2H-chromene-3-carboxylate 9

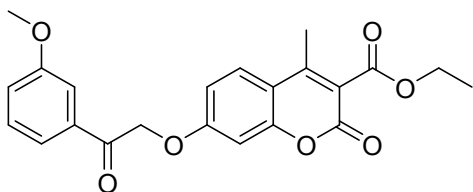

Orange solid; yield 74%;  $^1\text{H}$  NMR (400 MHz,  $\text{DMSO-}d_6$ )  $\delta$  1.30 (t,  $J = 7.0$  Hz, 3H,  $\text{CH}_2\text{CH}_3$ ), 2.44 (s, 3H, Ar- $\text{CH}_3$ ), 3.85 (s, 3H,  $\text{OCH}_3$ ), 4.33 (q,  $J = 7.0$  Hz, 2H,  $\text{CH}_2\text{CH}_3$ ), 5.79 (s, 2H,  $\text{CH}_2$ ), 7.11 (dd,  $J = 8.9$  Hz, 2.5 Hz, 1H, Ar- $\text{H}$ ), 7.16 (d,  $J = 2.5$  Hz, 1H, Ar- $\text{H}$ ), 7.30 (ddd,  $J = 7.9$  Hz, 2.5 Hz, 1.0 Hz, 1H, Ar- $\text{H}$ ), 7.50-7.54 (m, 2H, Ar- $\text{H}$ ), 7.64 (dt,  $J = 7.9$  Hz, 1.0 Hz, 1H, Ar- $\text{H}$ ), 7.83 (d,  $J = 8.9$  Hz, 1H, Ar- $\text{H}$ ). HRMS ( $m/z$ ) (ESI): calcd for  $\text{C}_{22}\text{H}_{20}\text{O}_7$  [ $\text{M}+\text{H}$ ] $^+$ : 397.1287, found: 397.1286.

#### Ethyl 7-(2-(4-bromophenyl)-2-oxoethoxy)-4-methyl-2-oxo-2H-chromene-3-carboxylate 10

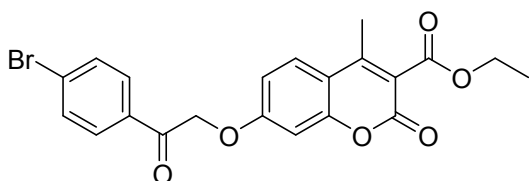

Yellow solid; yield 69%;  $^1\text{H}$  NMR (400 MHz,  $\text{DMSO-}d_6$ )  $\delta$  1.30 (t,  $J = 7.1$  Hz, 3H,  $\text{CH}_2\text{CH}_3$ ), 2.44 (s, 3H, Ar- $\text{CH}_3$ ), 4.33 (q,  $J = 7.1$  Hz, 2H,  $\text{CH}_2\text{CH}_3$ ), 5.77 (s, 2H,  $\text{CH}_2$ ), 7.11 (dd,  $J = 8.9$  Hz, 2.7 Hz,

1H, Ar-H), 7.18 (d,  $J = 2.7$  Hz, 1H, Ar-H), 7.82-7.84 (m, 3H, Ar-H), 7.98 (dt,  $J = 8.9$  Hz, 1.9 Hz, 2H, Ar-H). HRMS ( $m/z$ ) (ESI): calcd for  $C_{21}H_{17}BrO_6$   $[M+H]^+$ : 445.0287, found: 445.0285.

#### Ethyl 7-(2-(4-fluorophenyl)-2-oxoethoxy)-4-methyl-2-oxo-2H-chromene-3-carboxylate 11

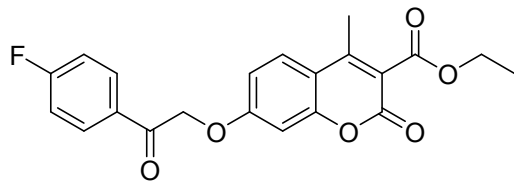

Off-white solid; yield 92%;  $^1H$  NMR (400 MHz,  $DMSO-d_6$ )  $\delta$  1.30 (t,  $J = 7.1$  Hz, 3H,  $CH_2CH_3$ ), 2.44 (s, 3H, Ar- $CH_3$ ), 4.33 (q,  $J = 7.1$  Hz, 2H,  $CH_2CH_3$ ), 5.78 (s, 2H,  $CH_2$ ), 7.11 (dd,  $J = 8.9$  Hz, 2.5 Hz, 1H, Ar-H), 7.17 (d,  $J = 2.5$  Hz, 1H, Ar-H), 7.42-7.47 (m, 2H, Ar-H), 7.83 (d,  $J = 8.9$  Hz, 1H, Ar-H), 8.11-8.15 (m, 2H, Ar-H). HRMS ( $m/z$ ) (ESI): calcd for  $C_{21}H_{17}FO_6$   $[M+H]^+$ : 385.1087, found: 385.1081.

#### Ethyl 4-methyl-2-oxo-7-(2-oxo-2-(thiophen-2-yl)ethoxy)-2H-chromene-3-carboxylate 12

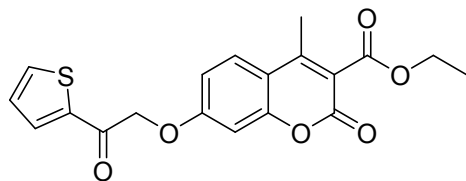

Brown solid; yield 53%;  $^1H$  NMR (400 MHz,  $DMSO-d_6$ )  $\delta$  1.30 (t,  $J = 7.1$  Hz, 3H,  $CH_2CH_3$ ), 2.44 (s, 3H, Ar- $CH_3$ ), 4.33 (q,  $J = 7.1$  Hz, 2H,  $CH_2CH_3$ ), 5.69 (s, 2H,  $CH_2$ ), 7.09-7.16 (m, 2H, Ar-H), 7.35 (t,  $J = 4.2$  Hz, 1H, Ar-H), 7.84 (d,  $J = 7.8$  Hz, 1H, Ar-H), 8.15 (dd,  $J = 7.8$  Hz, 4.2 Hz, 2H, Ar-H). HRMS ( $m/z$ ) (ESI): calcd for  $C_{19}H_{16}O_6S$   $[M+H]^+$ : 373.0746, found: 373.0750.

#### Ethyl 4-methyl-2-oxo-7-(2-oxo-2-(m-tolyl)ethoxy)-2H-chromene-3-carboxylate 13

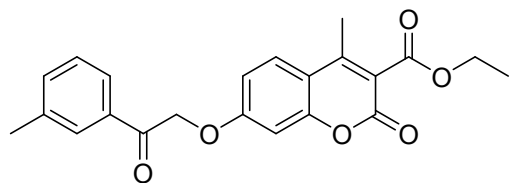

Brown solid; yield 73%;  $^1H$  NMR (400 MHz,  $DMSO-d_6$ )  $\delta$  1.30 (t,  $J = 7.2$  Hz, 3H,  $CH_2CH_3$ ), 2.42 (s, 3H, Ar- $CH_3$ ), 2.44 (s, 3H, Ar- $CH_3$ ), 4.33 (q,  $J = 7.2$  Hz, 2H,  $CH_2CH_3$ ), 5.78 (s, 2H,  $CH_2$ ), 7.08-

7.14 (m, 1H, Ar-H), 7.14-7.17 (m, 1H, Ar-H), 7.45-7.56 (m, 2H, Ar-H), 7.81-7.89 (m, 3H, Ar-H). HRMS (*m/z*) (ESI): calcd for C<sub>22</sub>H<sub>20</sub>O<sub>6</sub> [M+H]<sup>+</sup>: 381.1338, found: 381.1345.

**Ethyl 7-(2-cyclobutyl-2-oxoethoxy)-4-methyl-2-oxo-2H-chromene-3-carboxylate 15**

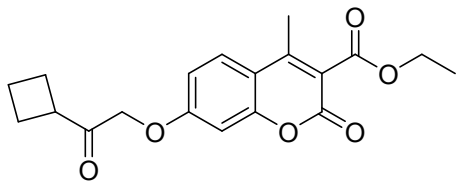

Brown oil; yield 77%; <sup>1</sup>H NMR (400 MHz, CDCl<sub>3</sub>) δ 1.40 (t, *J* = 7.3 Hz, 3H, CH<sub>2</sub>CH<sub>3</sub>), 2.12-2.37 (m, 6H, cyclobutyl-CH<sub>2</sub>), 2.45 (s, 3H, Ar-CH<sub>3</sub>), 3.47-3.57 (m, 1H, cyclobutyl-CH), 4.42 (d, *J* = 7.3 Hz, 2H, CH<sub>2</sub>CH<sub>3</sub>), 4.67 (s, 2H, CH<sub>2</sub>), 6.73 (d, *J* = 2.5 Hz, 1H, Ar-H), 6.91 (dd, *J* = 9.0 Hz, 2.5 Hz, 1H, Ar-H), 7.60 (d, *J* = 9.0 Hz, 1H, Ar-H). HRMS (*m/z*) (ESI): calcd for C<sub>18</sub>H<sub>18</sub>O<sub>6</sub> [M+H]<sup>+</sup>: 345.1338, found: 345.1343.

**Ethyl 7-(2-cyclopentyl-2-oxoethoxy)-4-methyl-2-oxo-2H-chromene-3-carboxylate 16**

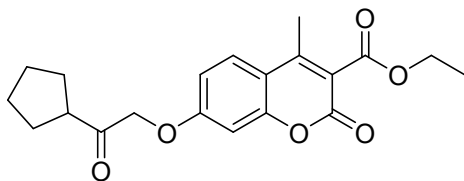

Brown oil; yield 52%; <sup>1</sup>H NMR (400 MHz, CDCl<sub>3</sub>) δ 1.40 (t, *J* = 7.1 Hz, 3H, CH<sub>2</sub>CH<sub>3</sub>), 1.60-1.94 (m, 8H, cyclopentyl-CH<sub>2</sub>), 2.45 (s, 3H, Ar-CH<sub>3</sub>), 3.05-3.15 (m, 1H, cyclopentyl-CH), 4.42 (d, *J* = 7.1 Hz, 2H, CH<sub>2</sub>CH<sub>3</sub>), 4.75 (s, 2H, CH<sub>2</sub>), 6.73 (d, *J* = 2.5 Hz, 1H, Ar-H), 6.93 (dd, *J* = 8.9 Hz, 2.5 Hz, 1H, Ar-H), 7.60 (d, *J* = 8.9 Hz, 1H, Ar-H). HRMS (*m/z*) (ESI): calcd for C<sub>19</sub>H<sub>20</sub>O<sub>6</sub> [M+H]<sup>+</sup>: 359.1495, found: 359.1497.

**3-(2-Methoxyphenyl)-5-methyl-7-oxo-7H-furo[3,2-g]chromen-6-carboxylic acid 18**

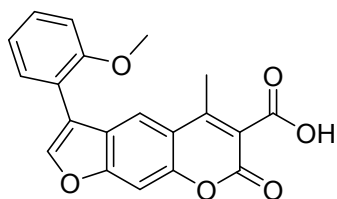

Brown solid; yield 100% (crude, unpurified product); <sup>1</sup>H NMR (400 MHz, DMSO-*d*<sub>6</sub>) δ 2.39 (s, 3H, Ar-CH<sub>3</sub>), 3.87 (s, 3H, OCH<sub>3</sub>), 7.21-7.23 (m, 1H, Ar-H), 7.62-7.67 (m, 3H, Ar-H), 7.68 (s, 1H,

Ar-H), 7.87 (s, 1H, Ar-H), 8.28 (s, 1H, Ar-H). HRMS ( $m/z$ ) (ESI): calcd for  $C_{20}H_{14}O_6$   $[M+H]^+$ : 351.0869, found: 351.0871.

### 3-(3-Methoxyphenyl)-5-methyl-7-oxo-7H-furo[3,2-g]chromen-6-carboxylic acid 19

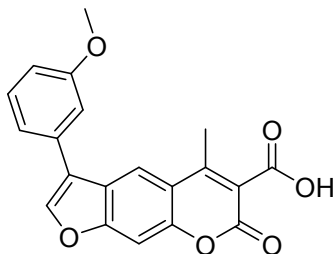

Orange solid; yield 100% (crude, unpurified product);  $^1H$  NMR (400 MHz,  $DMSO-d_6$ )  $\delta$  2.44 (s, 3H, Ar-CH<sub>3</sub>), 3.85 (s, 3H, OCH<sub>3</sub>), 6.95-6.97 (m, 1H, Ar-H), 7.27-7.30 (m, 2H, Ar-H), 7.64-7.66 (m, 1H, Ar-H), 7.72 (s, 1H, Ar-H), 8.08 (s, 1H, Ar-H), 8.47 (s, 1H, Ar-H). HRMS ( $m/z$ ) (ESI): calcd for  $C_{20}H_{14}O_6$   $[M+H]^+$ : 351.0869, found: 351.0865.

### 3-(4-Bromophenyl)-5-methyl-7-oxo-7H-furo[3,2-g]chromen-6-carboxylic acid 20

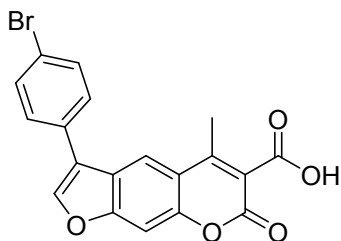

Orange solid; yield 100% (crude, unpurified product);  $^1H$  NMR (400 MHz,  $DMSO-d_6$ )  $\delta$  2.48 (s, 3H, Ar-CH<sub>3</sub>), 7.72-7.81 (m, 5H, Ar-H), 8.10 (s, 1H, Ar-H), 8.51 (s, 1H, Ar-H). HRMS ( $m/z$ ) (ESI): calcd for  $C_{19}H_{11}BrO_5$   $[M+H]^+$ : 398.9868, found: 398.9865.

### 3-(4-Fluorophenyl)-5-methyl-7-oxo-7H-furo[3,2-g]chromen-6-carboxylic acid 21

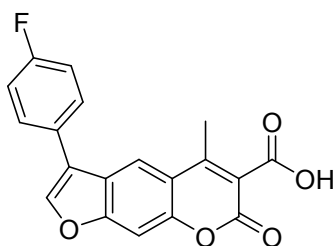

Orange solid; yield 100% (crude, unpurified product);  $^1H$  NMR (400 MHz,  $DMSO-d_6$ )  $\delta$  2.44 (s, 3H, Ar-CH<sub>3</sub>), 7.37-7.41 (m, 2H, Ar-H), 7.72 (s, 1H, Ar-H), 7.86-7.89 (m, 2H, Ar-H), 8.06 (s, 1H,

Ar-H), 8.45 (s, 1H, Ar-H). HRMS ( $m/z$ ) (ESI): calcd for  $C_{19}H_{11}FO_5$   $[M+H]^+$ : 339.0669, found: 339.0662.

### 5-Methyl-7-oxo-3-(thiophen-2-yl)-7H-furo[3,2-g]chromene-6-carboxylic acid 22

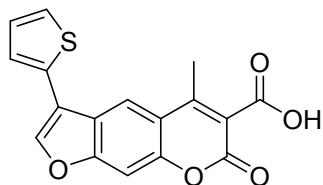

Brown oil; yield 100% (crude, unpurified product);  $^1H$  NMR (400 MHz,  $DMSO-d_6$ )  $\delta$  2.30 (s, 3H, Ar-CH<sub>3</sub>), 6.36-6.41 (m, 1H, Ar-H), 6.58 (s, 1H, Ar-H), 6.96-6.99 (m, 1H, Ar-H), 7.78 (s, 1H, Ar-H), 8.12-8.15 (m, 1H, Ar-H), 8.27 (s, 1H, Ar-H). HRMS ( $m/z$ ) (ESI): calcd for  $C_{17}H_9O_5S$   $[M+H]^+$ : 325.01762, found: 325.01709.

### 5-Methyl-7-oxo-3-(m-tolyl)-7H-furo[3,2-g]chromene-6-carboxylic acid 23

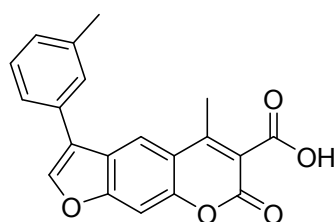

Brown oil; yield 100% (crude, unpurified product);  $^1H$  NMR (400 MHz,  $DMSO-d_6$ )  $\delta$  2.34 (s, 3H, Ar-CH<sub>3</sub>), 3.45 (s, 3H, Ar-CH<sub>3</sub>), 7.58-7.66 (m, 3H, Ar-H), 7.88 (s, 1H, Ar-H), 8.14 (s, 1H, Ar-H), 8.26 (s, 1H, Ar-H), 8.51 (s, 1H, Ar-H). HRMS ( $m/z$ ) (ESI): calcd for  $C_{20}H_{14}O_5$   $[M+H]^+$ : 335.0919, found: 335.0924.

### 3-Cyclobutyl-5-methyl-7-oxo-7H-furo[3,2-g]chromen-6-carboxylic acid 25

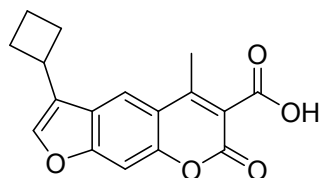

Brown oil; yield 55% (crude, unpurified product);  $^1H$  NMR (400 MHz,  $CDCl_3$ )  $\delta$  2.29-2.36 (m, 4H, cyclobutyl-CH<sub>2</sub>), 2.53 (s, 3H, Ar-CH<sub>3</sub>), 2.69-2.78 (m, 2H, cyclobutyl-CH<sub>2</sub>), 3.11-3.18 (m, 1H, cyclobutyl-CH), 7.21 (s, 1H, Ar-H), 7.43 (s, 1H, Ar-H), 7.66 (s, 1H, Ar-H). HRMS ( $m/z$ ) (ESI): calcd for  $C_{17}H_{14}O_5$   $[M+H]^+$ : 299.0919, found: 299.0913.



### 3-Cyclopentyl-5-methyl-7-oxo-7H-furo[3,2-g]chromen-6-carboxylic acid 26

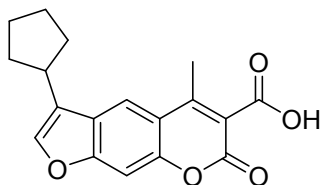

Orange solid; yield 79% (crude, unpurified product);  $^1\text{H NMR}$  (400 MHz,  $\text{DMSO-}d_6$ )  $\delta$  1.51-1.86 (m, 6H, cyclopentyl- $\text{CH}_2$ ), 2.12-2.23 (m, 2H, cyclopentyl- $\text{CH}_2$ ), 2.43 (s, 3H, Ar- $\text{CH}_3$ ), 3.20-3.26 (m, 1H, cyclopentyl- $\text{CH}$ ), 7.70 (s, 1H, Ar- $\text{H}$ ), 7.95 (d,  $J = 1.1$  Hz, 1H, Ar- $\text{H}$ ), 8.11 (s, 1H, Ar- $\text{H}$ ). HRMS ( $m/z$ ) (ESI): calcd for  $\text{C}_{18}\text{H}_{16}\text{O}_5$  [ $\text{M}+\text{H}$ ] $^+$ : 313.1076, found: 313.1084.

### 3-(2-Methoxyphenyl)-5-methyl-7-oxo-7H-furo[3,2-g]chromen-6-carboxamide 28

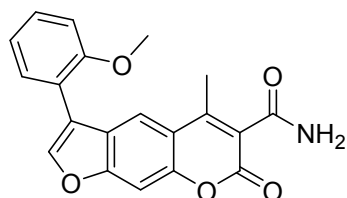

Yellow solid; yield 30%;  $^1\text{H NMR}$  (400 MHz,  $\text{DMSO-}d_6$ )  $\delta$  2.53 (s, 3H, Ar- $\text{CH}_3$ ), 3.87 (s, 3H,  $\text{OCH}_3$ ), 7.01-7.02 (m, 1H, Ar- $\text{H}$ ), 7.21-7.25 (m, 1H, Ar- $\text{H}$ ), 7.61-7.64 (m, 2H, Ar- $\text{H}$ ), 7.80-7.82 (m, 2H,  $\text{CONH}_2$ ), 7.83 (s, 1H, Ar- $\text{H}$ ), 8.03 (s, 1H, Ar- $\text{H}$ ), 8.34 (s, 1H, Ar- $\text{H}$ ). HRMS ( $m/z$ ) (ESI): calcd for  $\text{C}_{20}\text{H}_{15}\text{NO}_5$  [ $\text{M}+\text{H}$ ] $^+$ : 350.1028, found: 350.1023.

### 3-(3-Methoxyphenyl)-5-methyl-7-oxo-7H-furo[3,2-g]chromen-6-carboxamide 29

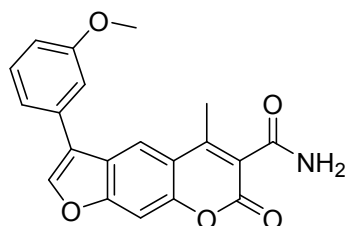

Off-white solid; yield 11%;  $^1\text{H NMR}$  (400 MHz,  $\text{DMSO-}d_6$ )  $\delta$  2.56 (s, 3H, Ar- $\text{CH}_3$ ), 3.86 (s, 3H,  $\text{OCH}_3$ ), 7.34-7.35 (m, 2H, Ar- $\text{H}$ ), 7.68-7.71 (m, 3H, Ar- $\text{H}$  and  $\text{CONH}_2$ ), 7.87 (s, 1H, Ar- $\text{H}$ ), 7.90-7.91 (m, 1H, Ar- $\text{H}$ ), 8.24 (s, 1H, Ar- $\text{H}$ ), 8.54 (s, 1H, Ar- $\text{H}$ ). HRMS ( $m/z$ ) (ESI): calcd for  $\text{C}_{20}\text{H}_{15}\text{NO}_5$  [ $\text{M}+\text{H}$ ] $^+$ : 350.1028, found: 350.1021.

### 3-(4-Bromophenyl)-5-methyl-7-oxo-7H-furo[3,2-g]chromen-6-carboxamide 30

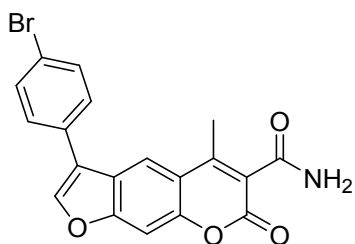

Off-white solid; yield 12%;  $^1\text{H}$  NMR (400 MHz,  $\text{DMSO-}d_6$ )  $\delta$  2.56 (s, 3H, Ar- $\text{CH}_3$ ), 7.75-7.76 (m, 2H, Ar- $\text{H}$  and CONH $_2$ ), 7.81-7.83 (m, 3H, Ar- $\text{H}$ ), 7.88 (s, 1H, Ar- $\text{H}$ ), 7.96-8.00 (m, 1H, CONH $_2$ ), 8.24 (s, 1H, Ar- $\text{H}$ ), 8.58 (s, 1H, Ar- $\text{H}$ ). HRMS ( $m/z$ ) (ESI): calcd for  $\text{C}_{19}\text{H}_{12}\text{BrNO}_4$  [ $\text{M}+\text{H}$ ] $^+$ : 398.0028, found: 398.0027.

### 3-(4-Fluorophenyl)-5-methyl-7-oxo-7H-furo[3,2-g]chromen-6-carboxamide 31

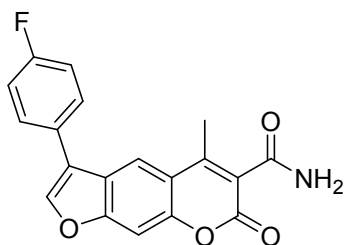

Off-white solid; yield 11%;  $^1\text{H}$  NMR (400 MHz,  $\text{DMSO-}d_6$ )  $\delta$  2.56 (s, 3H, Ar- $\text{CH}_3$ ), 7.37-7.44 (m, 3H, Ar- $\text{H}$  or CONH $_2$ ), 7.87-7.91 (m, 4H, Ar- $\text{H}$  or CONH $_2$ ), 8.23 (s, 1H, Ar- $\text{H}$ ), 8.52 (s, 1H, Ar- $\text{H}$ ). HRMS ( $m/z$ ) (ESI): calcd for  $\text{C}_{19}\text{H}_{12}\text{FNO}_4$  [ $\text{M}+\text{H}$ ] $^+$ : 338.0829, found: 338.0824.

### 5-Methyl-7-oxo-3-(thiophen-2-yl)-7H-furo[3,2-g]chromen-6-carboxamide 32

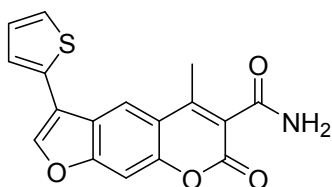

Off-white solid; yield 13%;  $^1\text{H}$  NMR (400 MHz,  $\text{CDCl}_3$ )  $\delta$  2.93 (s, 3H, Ar- $\text{CH}_3$ ), 7.09-7.12 (m, 1H, Ar- $\text{H}$ ), 7.20-7.23 (m, 1H, Ar- $\text{H}$ ), 7.37-7.44 (m, 1H, Ar- $\text{H}$ ), 7.52-7.55 (m, 3H, Ar- $\text{H}$  and CONH $_2$ ), 7.93 (s, 1H, Ar- $\text{H}$ ), 8.30 (s, 1H, Ar- $\text{H}$ ). HRMS ( $m/z$ ) (ESI): calcd for  $\text{C}_{17}\text{H}_{11}\text{NO}_4\text{S}$  [ $\text{M}+\text{H}$ ] $^+$ : 326.0487, found: 326.0489.

### 5-Methyl-7-oxo-3-(m-tolyl)-7H-furo[3,2-g]chromen-6-carboxamide 33

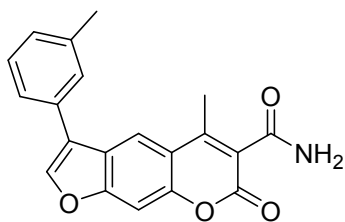

Orange solid; yield 13%;  $^1\text{H NMR}$  (400 MHz,  $\text{CDCl}_3$ )  $\delta$  2.47 (s, 3H, Ar- $\text{CH}_3$ ), 2.90 (s, 3H, Ar- $\text{CH}_3$ ), 7.33-7.35 (m, 2H, CONH $_2$ ), 7.42-7.46 (m, 2H, Ar-H), 7.53 (s, 1H, Ar-H), 7.57-7.61 (m, 2H, Ar-H), 7.84 (s, 1H, Ar-H), 8.19 (s, 1H, Ar-H). HRMS ( $m/z$ ) (ESI): calcd for  $\text{C}_{20}\text{H}_{15}\text{NO}_4$  [ $\text{M}+\text{H}$ ] $^+$ : 334.1079, found: 334.1086.

### 3-Cyclobutyl-5-methyl-7-oxo-7H-furo[3,2-g]chromen-6-carboxamide 35

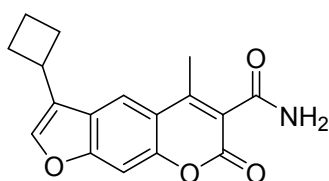

Yellow solid; yield 53%;  $^1\text{H NMR}$  (400 MHz,  $\text{CDCl}_3$ )  $\delta$  0.79-0.91 (m, 2H, cyclobutyl- $\text{CH}_2$ ), 1.95-2.04 (m, 2H, cyclobutyl- $\text{CH}_2$ ), 2.15-2.25 (m, 2H, cyclobutyl- $\text{CH}_2$ ), 2.45-2.55 (m, 1H, cyclobutyl-CH), 2.91 (s, 3H, Ar- $\text{CH}_3$ ), 7.21-7.23 (m, 1H, CONH $_2$ ), 7.43 (s, 1H, Ar-H), 7.50-7.53 (m, 2H, Ar-H and CONH $_2$ ), 7.89 (s, 1H, Ar-H). HRMS ( $m/z$ ) (ESI): calcd for  $\text{C}_{17}\text{H}_{14}\text{O}_5$  [ $\text{M}+\text{H}$ ] $^+$ : 298.1079, found: 298.1080.

### 3-Cyclopentyl-5-methyl-7-oxo-7H-furo[3,2-g]chrome-6-carboxamide 36

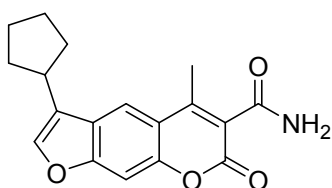

Off-white solid; yield 56%;  $^1\text{H NMR}$  (400 MHz,  $\text{CDCl}_3$ )  $\delta$  1.72-1.88 (m, 6H, cyclopentyl- $\text{CH}_2$ ), 2.17-2.25 (m, 2H, cyclopentyl- $\text{CH}_2$ ), 2.93 (s, 3H, Ar- $\text{CH}_3$ ), 3.15-3.24 (m, 1H, cyclopentyl-CH), 7.21-7.23 (m, 1H, CONH $_2$ ), 7.43 (s, 1H, Ar-H), 7.48 (d,  $J = 1.3$  Hz, 1H, CONH $_2$ ), 7.52 (s, 1H, Ar-H), 7.98 (s, 1H, Ar-H). HRMS ( $m/z$ ) (ESI): calcd for  $\text{C}_{18}\text{H}_{17}\text{NO}_4$  [ $\text{M}+\text{H}$ ] $^+$ : 312.1236, found: 312.1232.

**5-(3-(2-Methoxyphenyl)-5-methyl-7-oxo-7H-furo[3,2-g]chromen-6-yl)-1,3,4-oxathiazol-2-one 38**

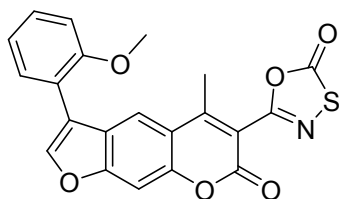

Yellow solid; yield 8%; mp 215.5-218.9 °C;  $^1\text{H}$  NMR (400 MHz,  $\text{CDCl}_3$ )  $\delta$  2.65 (s, 3H, Ar- $\text{CH}_3$ ), 3.92 (s, 3H,  $\text{OCH}_3$ ), 7.11-7.18 (m, 2H, Ar- $\text{H}$ ), 7.47 (td,  $J = 7.9$  Hz, 1.8 Hz, 1H, Ar- $\text{H}$ ), 7.57-7.59 (m, 2H, Ar- $\text{H}$ ), 7.99 (s, 1H, Ar- $\text{H}$ ), 8.05 (s, 1H, Ar- $\text{H}$ ).  $^{13}\text{C}$  NMR (100 MHz,  $\text{CDCl}_3$ )  $\delta$  176.77, 163.88, 163.74, 163.62, 162.99, 158.89, 146.60, 130.77, 130.24, 130.08, 130.03, 128.07, 121.16, 117.46, 116.11, 112.38, 111.50, 108.83, 105.97, 96.22, 46.80, 21.24. HRMS ( $m/z$ ) (ESI): calcd for  $\text{C}_{21}\text{H}_{13}\text{NO}_6\text{S}$  [ $\text{M}+\text{H}$ ] $^+$ : 408.0542, found: 408.0550. Purity by HPLC: 95%.

**5-(3-(3-Methoxyphenyl)-5-methyl-7-oxo-7H-furo[3,2-g]chromen-6-yl)-1,3,4-oxathiazol-2-one 39**

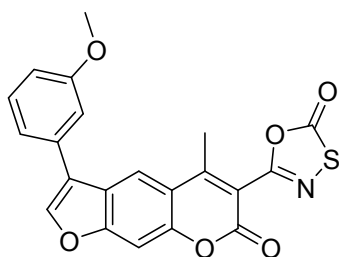

Yellow solid; yield 7%; mp 188.8-191.5 °C;  $^1\text{H}$  NMR (400 MHz,  $\text{CDCl}_3$ )  $\delta$  2.68 (s, 3H, Ar- $\text{CH}_3$ ), 3.92 (s, 3H,  $\text{OCH}_3$ ), 7.02-7.04 (m, 1H, Ar- $\text{CH}_3$ ), 7.16-7.17 (m, 1H, Ar- $\text{H}$ ), 7.22-7.24 (m, 1H, Ar- $\text{H}$ ), 7.50 (t,  $J = 7.9$  Hz, 1H, Ar- $\text{H}$ ), 7.60 (s, 1H, Ar- $\text{H}$ ), 7.91 (s, 1H, Ar- $\text{H}$ ), 8.15 (s, 1H, Ar- $\text{H}$ ).  $^{13}\text{C}$  NMR (100 MHz,  $\text{CDCl}_3$ )  $\delta$  172.09, 160.28, 159.36, 169.06, 149.94, 143.72, 136.75, 130.50, 124.98, 124.84, 124.73, 120.05, 117.75, 117.65, 116.06, 113.80, 113.33, 110.59, 100.63, 55.44, 17.19. HRMS ( $m/z$ ) (ESI): calcd for  $\text{C}_{21}\text{H}_{13}\text{NO}_6\text{S}$  [ $\text{M}+\text{H}$ ] $^+$ : 408.0542, found: 408.0541. Purity by HPLC: 100%.

**5-(3-(4-Bromophenyl)-5-methyl-7-oxo-7H-furo[3,2-g]chromen-6-yl)-1,3,4-oxathiazol-2-one 40**

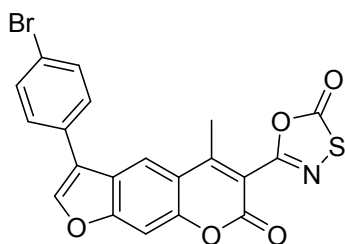

Yellow solid; yield 17%; mp 237.5-238.9 °C;  $^1\text{H}$  NMR (400 MHz,  $\text{CDCl}_3$ )  $\delta$  2.68 (s, 3H, Ar- $\text{CH}_3$ ), 7.50-7.54 (m, 2H, Ar- $\text{H}$ ), 7.61 (s, 1H, Ar- $\text{H}$ ), 7.69-7.72 (m, 2H, Ar- $\text{H}$ ), 7.91 (s, 1H, Ar- $\text{H}$ ), 8.08 (s, 1H, Ar- $\text{H}$ ).  $^{13}\text{C}$  NMR (100 MHz,  $\text{CDCl}_3$ )  $\delta$  172.85, 158.10, 155.99, 153.45, 151.53, 143.68, 132.64, 132.59 (2C), 129.42, 129.20 (2C), 124.65, 122.42, 121.53, 117.32, 115.72, 112.97, 100.74, 17.16. HRMS ( $m/z$ ) (ESI): calcd for  $\text{C}_{20}\text{H}_{10}\text{BrNO}_5\text{S}$  [ $\text{M}+\text{H}$ ] $^+$ : 455.9541, found: 455.9546. Purity by HPLC: 100%.

**5-(3-(4-Fluorophenyl)-5-methyl-7-oxo-7H-furo[3,2-g]chromen-6-yl)-1,3,4-oxathiazol-2-one**  
**41**

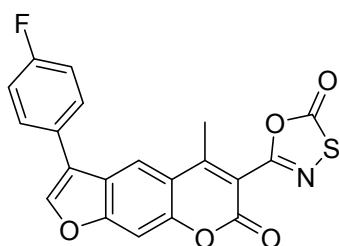

Off-white solid; yield 8%; mp 217.5-218.9 °C;  $^1\text{H}$  NMR (400 MHz,  $\text{CDCl}_3$ )  $\delta$  2.68 (s, 3H, Ar- $\text{CH}_3$ ), 7.25-7.30 (m, 2H, Ar- $\text{H}$ ), 7.60-7.63 (m, 3H, Ar- $\text{H}$ ), 7.87 (s, 1H, Ar- $\text{H}$ ), 8.08 (s, 1H, Ar- $\text{H}$ ).  $^{13}\text{C}$  NMR (100 MHz,  $\text{CDCl}_3$ )  $\delta$  172.88, 163.98, 158.07, 156.04, 153.48, 151.50, 143.50, 129.42 (2C), 129.34, 126.50, 124.95, 121.59, 117.31, 116.59 (2C), 116.38, 115.65, 100.69, 17.16. HRMS ( $m/z$ ) (ESI): calcd for  $\text{C}_{20}\text{H}_{10}\text{FNO}_5\text{S}$  [ $\text{M}+\text{H}$ ] $^+$ : 396.0342, found: 396.0340. Purity by HPLC: 98%.

**5-(5-Methyl-7-oxo-3-(thiophen-2-yl)-7H-furo[3,2-g]chromen-6-yl)-1,3,4-oxathiazol-2-one**  
**42**

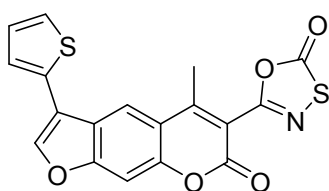

Yellow solid; yield 5%; mp 215.7-216.5 °C;  $^1\text{H}$  NMR (400 MHz,  $\text{CDCl}_3$ )  $\delta$  2.79 (s, 3H, Ar- $\text{CH}_3$ ), 7.26-7.29 (m, 1H, Ar- $\text{H}$ ), 7.67-7.70 (m, 1H, Ar- $\text{H}$ ), 7.74-7.76 (m, 1H, Ar- $\text{H}$ ), 7.96 (s, 1H, Ar- $\text{H}$ ), 8.40 (s, 1H, Ar- $\text{H}$ ), 8.62 (s, 1H, Ar- $\text{H}$ ).  $^{13}\text{C}$  NMR (100 MHz,  $\text{CDCl}_3$ )  $\delta$  173.68, 165.73, 165.14, 156.93, 153.15, 146.15, 139.77, 138.41, 133.67, 127.60, 127.56, 126.54, 123.05, 122.88, 122.75, 110.79, 92.99, 24.50. HRMS ( $m/z$ ) (ESI): calcd for  $\text{C}_{18}\text{H}_{10}\text{NO}_5\text{S}_2$  [ $\text{M}+\text{H}$ ] $^+$ : 383.99949, found: 383.99899. Purity by HPLC: 97%.

### 5-(5-Methyl-7-oxo-3-(*m*-tolyl)-7H-furo[3,2-*g*]chromen-6-yl)-1,3,4-oxathiazol-2-one 43

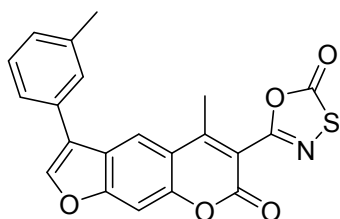

Yellow solid; yield 15%; mp 64.5-65.7 °C;  $^1\text{H}$  NMR (400 MHz,  $\text{CDCl}_3$ )  $\delta$  2.47 (s, 3H, Ar- $\text{CH}_3$ ), 2.65 (s, 3H, Ar- $\text{CH}_3$ ), 7.40-7.46 (m, 3H, Ar- $\text{H}$ ), 7.57 (s, 1H, Ar- $\text{H}$ ), 7.86 (s, 1H, Ar- $\text{H}$ ), 8.12 (s, 1H, Ar- $\text{H}$ ), one aromatic proton overlapping with solvent.  $^{13}\text{C}$  NMR (100 MHz,  $\text{CDCl}_3$ )  $\delta$  173.35, 158.17, 157.50, 156.22, 151.44, 143.57, 139.20, 130.42, 129.33, 129.29, 129.18, 128.46, 125.11, 124.78, 122.56, 119.71, 117.64, 115.55, 100.59, 21.60, 17.18. HRMS ( $m/z$ ) (ESI): calcd for  $\text{C}_{21}\text{H}_{14}\text{NO}_5\text{S}$  [ $\text{M}+\text{H}$ ] $^+$ : 392.05872, found: 392.05805. Purity by HPLC: 100%.

### 5-(3-Cyclobutyl-5-methyl-7-oxo-7H-furo[3,2-*g*]chromen-6-yl)-1,3,4-oxathiazol-2-one 45

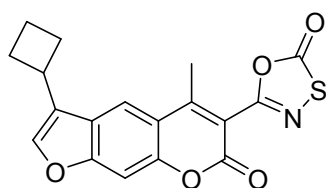

Yellow solid; yield 6%; mp 137.7-138.9 °C;  $^1\text{H}$  NMR (400 MHz,  $\text{CDCl}_3$ )  $\delta$  1.98-2.07 (m, 1H, cyclobutyl- $\text{CH}_2$ ), 2.15-2.26 (m, 3H, cyclobutyl- $\text{CH}_2$ ), 2.47-2.55 (m, 2H, cyclobutyl- $\text{CH}_2$ ), 2.65 (s, 3H, Ar- $\text{CH}_3$ ), 3.64-3.71 (m, 1H, cyclobutyl- $\text{CH}$ ), 7.47 (s, 1H, Ar- $\text{H}$ ), 7.52 (d,  $J = 1.4$  Hz, 1H, Ar- $\text{H}$ ), 7.81 (s, 1H, Ar- $\text{H}$ ).  $^{13}\text{C}$  NMR (100 MHz,  $\text{CDCl}_3$ )  $\delta$  172.97, 158.15, 157.92, 156.24, 153.66, 151.34, 142.91, 125.97, 125.36, 116.87, 114.86, 112.37, 100.26, 30.11, 28.76 (2C), 19.31, 17.10. HRMS ( $m/z$ ) (ESI): calcd for  $\text{C}_{18}\text{H}_{14}\text{NO}_5\text{S}$  [ $\text{M}+\text{H}$ ] $^+$ : 356.05872, found: 356.05797. Purity by HPLC: 94%.

### 5-(3-Cyclopentyl-5-methyl-7-oxo-7H-furo[3,2-g]chromen-6-yl)-1,3,4-oxathiazol-2-one 46

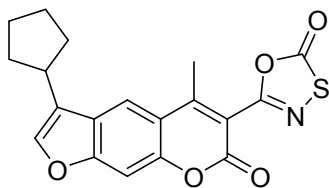

Off-white solid; yield 6%; mp 134.0-135.7 °C;  $^1\text{H}$  NMR (400 MHz,  $\text{CDCl}_3$ )  $\delta$  1.60-1.82 (m, 6H, cyclopentyl- $\text{CH}_2$ ), 2.14-2.23 (m, 2H, cyclopentyl- $\text{CH}_2$ ), 2.74 (s, 3H, Ar- $\text{CH}_3$ ), 3.22-3.28 (m, 1H, cyclopentyl- $\text{CH}$ ), 7.79 (s, 1H, Ar- $\text{H}$ ), 8.00 (d,  $J = 1.2$  Hz, 1H, Ar- $\text{H}$ ), 8.24 (s, 1H, Ar- $\text{H}$ ).  $^{13}\text{C}$  NMR (100 MHz,  $\text{CDCl}_3$ )  $\delta$  172.97, 158.22, 157.93, 156.26, 153.68, 151.27, 142.42, 126.60, 125.08, 117.16, 114.81, 112.36, 100.22, 35.20, 32.40 (2C), 25.06 (2C), 17.12. HRMS ( $m/z$ ) (ESI): calcd for  $\text{C}_{19}\text{H}_{16}\text{NO}_5\text{S}$  [ $\text{M}+\text{H}$ ] $^+$ : 370.07437, found: 370.07361. Purity by HPLC: 95%.

Spectroscopic analyses of compounds 48-53 were reported previously.<sup>[1]</sup>

### 2,5-Dioxopyrrolidin-1-yl 2-(3-cyclohexyl-5-methyl-7-oxo-7H-furo[3,2-g]chromen-6-yl)acetate 54

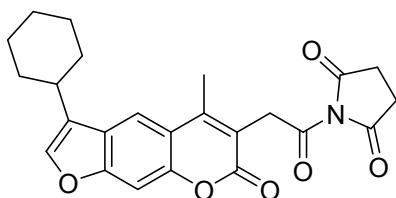

White solid; yield 34%; mp 161.0-162.7 °C;  $^1\text{H}$  NMR (400 MHz,  $\text{DMSO-d}_6$ )  $\delta$  1.22-1.30 (m, 1H, cyclohexyl- $\text{H}$ ), 1.37-1.50 (m, 4H, cyclohexyl- $\text{H}$ ), 1.70-1.77 (m, 1H, cyclohexyl- $\text{H}$ ), 1.78-1.83 (m, 2H, cyclohexyl- $\text{H}$ ), 2.01-2.09 (m, 2H, cyclohexyl- $\text{H}$ ), 2.61 (s, 3H, Ar- $\text{CH}_3$ ), 2.80 (rs, 4H,  $\text{COCH}_2\text{CH}_2\text{CO}$ ), 2.81-2.90 (m, 1H, cyclohexyl- $\text{H}$ ), 4.14 (s, 2H,  $\text{CH}_2\text{COO}$ ), 7.71 (s, 1H, Ar- $\text{H}$ ), 7.88 (s, 1H, Ar- $\text{H}$ ), 8.15 (s, 1H, Ar- $\text{H}$ );  $^{13}\text{C}$  NMR (100 MHz,  $\text{DMSO-d}_6$ )  $\delta$  170.02, 166.38, 160.41, 155.88, 151.42, 149.78, 142.65, 126.27, 124.72, 116.85, 115.66, 115.10, 99.26, 33.01, 32.48, 29.77, 25.97, 25.68, 25.37, 15.84. HRMS ( $m/z$ ) (ESI): calcd for  $\text{C}_{24}\text{H}_{24}\text{NO}_7$  [ $\text{M}+\text{H}$ ] $^+$ : 438.1553, found: 438.1548. Elemental analysis: found: C, 65.48; H, 5.14; N, 3.21 calc. for  $\text{C}_{24}\text{H}_{23}\text{NO}_7$ : C, 65.90; H, 5.30; N, 3.20%.

***N*-(Cyanomethyl)-2-(3-cyclohexyl-5-methyl-7-oxo-7*H*-furo[3,2-*g*]chromen-6-yl)-*N*-methylacetamide 56**

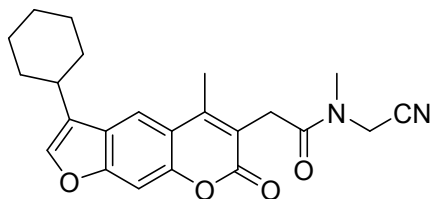

Yellow-white solid; yield 29%; mp 177.2-179.3 °C; <sup>1</sup>H NMR (400 MHz, CDCl<sub>3</sub>) δ 1.22-1.34 (m, 1H, cyclohexyl-H), 1.37-1.52 (m, 4H, cyclohexyl-H), 1.70-1.86 (m, 3H, cyclohexyl-H), 2.02-2.10 (m, 2H, cyclohexyl-H), 2.49 (s, 3H, Ar-CH<sub>3</sub>), 2.72-2.82 (m, 1H, cyclohexyl-H), 3.35 (s, 3H, NCH<sub>3</sub>), 3.81 (s, 2H, CH<sub>2</sub>CO), 4.39 (s, 2H, CH<sub>2</sub>CN), 7.26 (s, 1H, Ar-H), 7.42 (s, 1H, Ar-H), 7.79 (s, 1H, Ar-H); <sup>13</sup>C NMR (100 MHz, CDCl<sub>3</sub>) δ 169.88, 162.04, 159.73, 156.57, 150.44, 141.71, 126.47, 125.18, 117.64, 116.36, 115.54, 115.31, 99.70, 35.71, 35.62, 34.13, 33.07 (2C), 31.82, 26.51 (2C), 26.25, 16.38. HRMS (*m/z*) (ESI): calcd for C<sub>23</sub>H<sub>25</sub>N<sub>2</sub>O<sub>4</sub> [M+H]<sup>+</sup>: 392.1745, found: 392.1741. Purity by HPLC: 93%.

***N*-(Cyanomethyl)-3-(3-cyclohexyl-5-methyl-7-oxo-7*H*-furo[3,2-*g*]chromen-6-yl)-*N*-methylpropanamide 57**

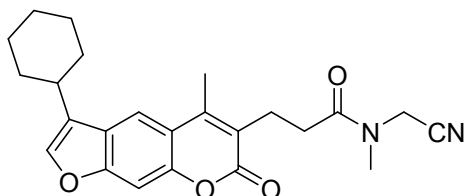

Yellow-brown solid; yield 24%; mp 77.3-78.4 °C; <sup>1</sup>H NMR (400 MHz, CDCl<sub>3</sub>) δ 1.43-1.51 (m, 4H, cyclohexyl-H), 1.77-1.92 (m, 4H, cyclohexyl-H), 2.07-2.15 (m, 2H, cyclohexyl-H), 2.61 (s, 3H, Ar-CH<sub>3</sub>), 2.70 (t, *J* = 7.2 Hz, 2H, CH<sub>2</sub>CH<sub>2</sub>CO), 2.73-2.80 (m, 1H, cyclohexyl-H), 3.03 (t, *J* = 7.2 Hz, 2H, CH<sub>2</sub>CH<sub>2</sub>CO), 3.17 (s, 3H, NCH<sub>3</sub>), 4.35 (s, 2H, CH<sub>2</sub>CN), 7.40 (s, 1H, Ar-H), 7.41 (s, 1H, Ar-H), 7.77 (s, 1H, Ar-H); <sup>13</sup>C NMR (100 MHz, CDCl<sub>3</sub>) δ 189.24, 173.32, 173.04, 170.62, 157.77, 149.37, 142.73, 139.06, 126.46, 115.62, 112.92, 110.87, 103.89, 47.67, 46.56, 43.94, 41.86, 33.07 (2C), 29.72, 26.49 (2C), 26.23, 15.66. HRMS (*m/z*) (ESI): calcd for C<sub>24</sub>H<sub>27</sub>N<sub>2</sub>O<sub>4</sub> [M+H]<sup>+</sup>: 406.1895, found: 406.1894. Purity by HPLC: 95%.

***N*-(Cyanomethyl)-2-(3-cyclohexyl-5-methyl-7-oxo-7*H*-furo[3,2-*g*]chromen-6-yl)acetamide 58**



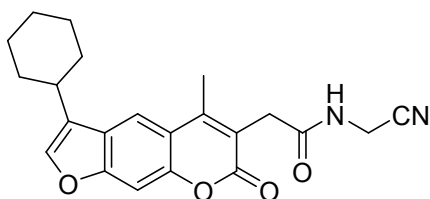

Yellow-brown solid; yield 21%; mp 204.9-206.6 °C;  $^1\text{H}$  NMR (400 MHz,  $\text{CDCl}_3$ )  $\delta$  1.22-1.34 (m, 1H, cyclohexyl-H), 1.40-1.52 (m, 4H, cyclohexyl-H), 1.70-1.75 (m, 1H, cyclohexyl-H), 1.78-1.91 (m, 2H, cyclohexyl-H), 2.08-2.13 (m, 2H, cyclohexyl-H), 2.69 (s, 3H, Ar- $\text{CH}_3$ ), 2.72-2.80 (m, 1H, cyclohexyl-H), 3.69 (s, 2H,  $\text{CH}_2\text{CO}$ ), 4.13 (d,  $J = 5.8$  Hz, 2H,  $\text{NHCH}_2$ ), 7.08 (t,  $J = 5.8$  Hz, 1H,  $\text{NHCH}_2$ ), 7.44 (s, 2H, Ar-H), 7.81 (s, 1H, Ar-H);  $^{13}\text{C}$  NMR (100 MHz,  $\text{CDCl}_3$ )  $\delta$  169.77, 163.31, 156.70, 151.19, 150.02, 142.00, 126.46, 125.60, 116.89, 116.14, 115.84, 115.78, 99.77, 35.64, 34.06, 33.02, 27.50, 26.44, 26.18, 16.21. HRMS ( $m/z$ ) (ESI): calcd for  $\text{C}_{22}\text{H}_{23}\text{N}_2\text{O}_4$   $[\text{M}+\text{H}]^+$ : 379.1658, found: 379.1661. Purity by HPLC: 95%.

**N-(Cyanomethyl)-3-(3-cyclohexyl-5-methyl-7-oxo-7H-furo[3,2-g]chromen-6-yl)propanamide 59**

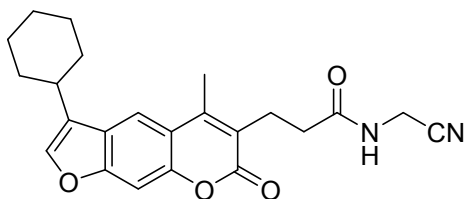

Yellow-brown solid; yield 26%; mp 119.8-123.7 °C;  $^1\text{H}$  NMR (400 MHz,  $\text{CDCl}_3$ )  $\delta$  1.21-1.28 (m, 4H, cyclohexyl-H), 1.88-1.95 (m, 4H, cyclohexyl-H), 2.02-2.15 (m, 2H, cyclohexyl-H), 2.61 (s, 3H, Ar- $\text{CH}_3$ ), 2.62 (t,  $J = 7.4$  Hz, 2H,  $\text{CH}_2\text{CH}_2\text{CO}$ ), 2.77 (sim m, 1H, cyclohexyl-H), 3.05 (t,  $J = 7.4$  Hz, 2H,  $\text{CH}_2\text{CH}_2\text{CO}$ ), 4.15 (d,  $J = 5.8$  Hz, 2H,  $\text{NHCH}_2$ ), 6.68 (t,  $J = 5.8$  Hz, 1H,  $\text{NHCH}_2$ ), 7.32 (s, 1H, Ar-H), 7.38 (s, 1H, Ar-H), 7.77 (s, 1H, Ar-H);  $^{13}\text{C}$  NMR (100 MHz,  $\text{CDCl}_3$ )  $\delta$  172.72, 162.78, 156.14, 149.78, 149.53, 141.54, 126.36, 125.21, 121.65, 116.26, 116.21, 115.56, 99.14, 34.45, 34.01, 33.01, 27.41, 26.45, 26.21, 24.01, 15.77. HRMS ( $m/z$ ) (ESI): calcd for  $\text{C}_{23}\text{H}_{25}\text{N}_2\text{O}_4$   $[\text{M}+\text{H}]^+$ : 392.1741, found: 392.1740. Purity by HPLC: 94%.

**Synthesis of DPLG-3**

***tert*-Butyl-(*S*)-(3-(4-fluorophenyl)-1-((naphthalen-1-ylmethyl)amino)-1-oxopropan-2-yl)carbamate (S1)**

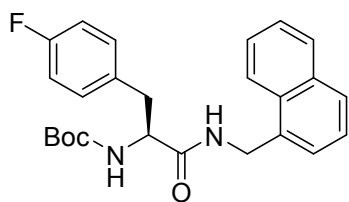

White solid.  $^1\text{H NMR}$  (400 MHz,  $\text{DMSO-}d_6$ )  $\delta$  1.30 (s, 9H,  $\text{C}(\text{CH}_3)_3$ ), 2.77 (dd,  $J = 14,0$  Hz, 10,1 Hz, 1H,  $\text{Ar-CH}_a$ ), 2.93 (dd,  $J = 13,6$  Hz, 5,1 Hz, 1H,  $\text{Ar-CH}_b$ ), 4.15 – 4.24 (m, 1H,  $\text{CH}$ ), 4.74 (d,  $J = 5,5$  Hz, 2H,  $\text{CH}_2\text{NH}$ ), 7.01 – 7.09 (m, 3H,  $\text{Ar-H}$ ), 7.24 – 7.29 (m, 2H,  $\text{Ar-H}$ ), 7.35 – 7.38 (m, 1H,  $\text{Ar-H}$ ), 7.40 – 7.45 (m, 1H,  $\text{Ar-H}$ ), 7.52 – 7.56 (m, 2H,  $\text{Ar-H}$ ), 7.85 (d,  $J = 8,0$  Hz, 1H,  $\text{Boc-NH}$ ), 7.94 (dd,  $J = 6,2$  Hz, 3,4 Hz, 1H,  $\text{Ar-H}$ ), 8.03 (dd,  $J = 6,3$  Hz, 3,4 Hz, 1H,  $\text{Ar-H}$ ), 8.48 (t,  $J = 5,6$  Hz, 1H,  $\text{CONH}$ ).

**(S)-3-(4-Fluorophenyl)-1-((naphthalen-1-ylmethyl)amino)-1-oxopropan-2-aminium 2,2,2-trifluoroacetate (S2)**

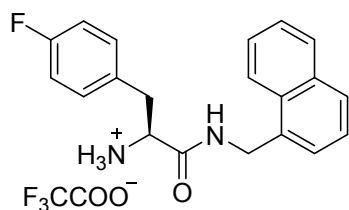

White solid.  $^1\text{H NMR}$  (400 MHz,  $\text{DMSO-}d_6$ )  $\delta$  2.95 – 3.06 (m, 2H,  $\text{CH}_2\text{NH}$ ), 4.03 (t,  $J = 7,0$  Hz, 1H,  $\text{CH}$ ), 4.67 (dd,  $J = 15,1$ , 5,1 Hz, 1H,  $\text{Ar-CH}_a$ ), 4.80 (dd,  $J = 15,1$ , 5,8 Hz, 1H,  $\text{Ar-CH}_b$ ), 7.03 – 7.09 (m, 2H  $\text{Ar-H}$ ), 7.17 – 7.22 (m, 2H,  $\text{Ar-H}$ ), 7.27 (d,  $J = 6,8$  Hz, 1H,  $\text{Ar-H}$ ), 7.43 (dd,  $J = 8,5$  Hz, 7,0 Hz, 1H,  $\text{Ar-H}$ ), 7.53 – 7.58 (m, 2H,  $\text{Ar-H}$ ), 7.88 (d,  $J = 8,3$  Hz, 1H,  $\text{Ar-H}$ ), 7.93 – 7.99 (m, 2H,  $\text{Ar-H}$ ), 8,30 (bs, 3H,  $\text{NH}_3^+$ ), 8,90 (t,  $J = 5,5$  Hz, 1H,  $\text{CONH}$ ).

**Benzyl  $N^4$ -(tert-butoxy)- $N^2$ -(tert-butoxycarbonyl)-L-asparaginate (S3)**

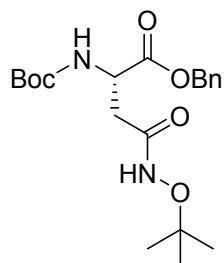

Colourless oil.  $^1\text{H NMR}$  (400 MHz,  $\text{DMSO-}d_6$ )  $\delta$  1.13 (s, 9H,  $\text{C}(\text{CH}_3)_3$ ), 1.36 (s, 9H,  $\text{C}(\text{CH}_3)_3$ ), 2.40 (dd,  $J = 15,1$  Hz, 8,0 Hz, 1H,  $\text{COCH}_a$ ), 2.55 (dd,  $J = 14,8$  Hz, 5,9 Hz, 1H,  $\text{COCH}_b$ ), 4.36 – 4.43 (m,

1H, CH), 5.11 (s, 2H, Ar-CH<sub>2</sub>), 7.23 (d, *J* = 8,3 Hz, 1H, Boc-NH), 7.30 – 7.39 (m, 5H, Ar-H), 10.34 (s, 1H, CONH<sub>2</sub>).

**(S)-1-(Benzyloxy)-4-(tert-butoxyamino)-1,4-dioxobutan-2-aminium 2,2,2-trifluoroacetate (S4)**

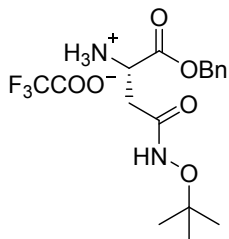

White solid. The compound was used in the next step without further characterisation.

**Benzyl N<sup>4</sup>-(tert-butoxy)-N<sup>2</sup>-(3-phenylpropanoyl)-L-asparaginate (S5)**

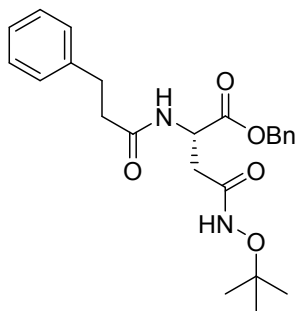

White solid. <sup>1</sup>H NMR (400 MHz, DMSO-*d*<sub>6</sub>) δ 1.12 (s, 9H, C(CH<sub>3</sub>)<sub>3</sub>), 2.37 – 2.44 (m, 3H, overlapping COCH<sub>a</sub> and CH<sub>2</sub>CH<sub>2</sub>), 2.57 (dd, *J* = 15.0, 6.2 Hz, 1H, COCH<sub>b</sub>), 2.77 (t, *J* = 8,0 Hz, 2H, CH<sub>2</sub>CH<sub>2</sub>), 4.61 - 4.68 (m, 0.9H, CH (major)), 4.75 - 4.81 (m, 0.1H, CH (minor)), 5.10 (s, 2H, Ar-CH<sub>2</sub>), 7.14 – 7.20 (m, 3H, Ar-H), 7.22 - 7.28 (m, 2H, Ar-H), 7.38 - 7.31 (m, 5H, Ar-H), 8.30 (m, 0.1H, CONH (minor)), 8.39 (d, *J* = 7,9 Hz, 0.9H, CONH (major)), 10.16 (s, 0.1H, CONH<sub>2</sub> (minor)), 10.38 (s, 0.9H, CONH<sub>2</sub> (major)).

**N<sup>4</sup>-(tert-butoxy)-N<sup>2</sup>-(3-phenylpropanoyl)-L-asparagine (S6)**

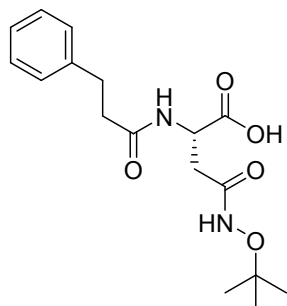

Off-white solid.  $^1\text{H}$  NMR (400 MHz,  $\text{DMSO-}d_6$ )  $\delta$  1.13 (s, 9H,  $\text{C}(\text{CH}_3)_3$ ), 2.30 – 2.42 (m, 3H, overlapping  $\text{COCH}_a$  and  $\text{CH}_2\text{CH}_2$ ), 2.51 – 2.54 (m, 1H,  $\text{COCH}_b$ , partially overlapping with residual solvent signal), 2.75 – 2.81 (m, 2H,  $\text{CH}_2$ ), 4.48 – 4.55 (m, 1H,  $\text{CH}$ ), 7.14 – 7.21 (m, 3H,  $\text{Ar-H}$ ), 7.23 – 7.29 (m, 2H,  $\text{Ar-H}$ ), 8.18 (d,  $J = 8.0$  Hz, 1H,  $\text{CONH}$ ), 10.35 (s, 1H,  $\text{CONHO}$ ), 12.73 (bs, 1H,  $\text{COOH}$ ).

**(S)- $N^4$ -(tert-butoxy)- $N^1$ -((S)-3-(4-fluorophenyl)-1-((naphthalen-1-ylmethyl)amino)-1-oxopropan-2-yl)-2-(3-phenylpropanamido)succinamide (DPLG-3)**

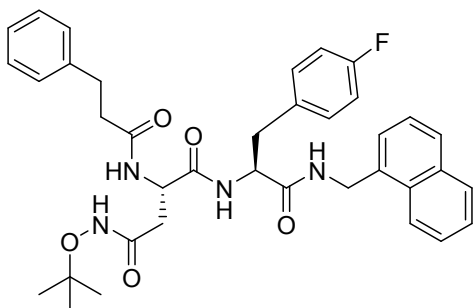

White solid.  $^1\text{H}$  NMR (400 MHz,  $\text{DMSO-}d_6$ )  $\delta$  1.11 (s, 9H,  $\text{C}(\text{CH}_3)_3$ ), 2.26 (dd,  $J = 14,7, 7,8$  Hz, 1H,  $\text{COCH}_a$ ), 2.31 – 2.39 (m, 2H,  $\text{CH}_2\text{CH}_2$ ), 2.46 (dd,  $J = 14,9, 6,5$  Hz, 1H,  $\text{COCH}_b$ ), 2.71 – 2.77 (m, 2H,  $\text{CH}_2\text{CH}_2$ ), 2.81 (dd,  $J = 13,7, 9,3$  Hz, 1H,  $\text{Ar-CH}_a$ ), 3.04 (dd,  $J = 13,9, 4,7$  Hz, 1H  $\text{Ar-CH}_b$ ), 4.43 – 4.49 (m, 1H,  $\text{CH}$ ), 4.55 – 4.62 (m, 1H,  $\text{CH}$ ), 4.70 (dd,  $J = 15,0, 5,7$  Hz, 1H,  $\text{Ar-CH}_a$ ), 4.72 (dd,  $J = 15,3, 5,8$  Hz, 1H,  $\text{Ar-CH}_b$ ), 6.95 – 7.02 (m, 2H,  $\text{Ar-H}$ ), 7.14 – 7.22 (m, 5H,  $\text{Ar-H}$ ), 7.23 – 7.29 (m, 2H,  $\text{Ar-H}$ ), 7.36 (d,  $J = 7,0$  Hz, 1H,  $\text{CONHCH}$ ), 7.40 – 7,46 (m, 1H,  $\text{Ar-H}$ ), 7.51 – 7.58 (m, 2H,  $\text{Ar-H}$ ), 7.84 (d,  $J = 8,1$  Hz, 1H,  $\text{CONHCH}$ ), 7.91 – 7.97 (m, 1H,  $\text{Ar-H}$ ), 8.05 – 8.13 (m, 3H,  $\text{Ar-H}$ ), 8.54 (t,  $J = 5,6$  Hz, 1H,  $\text{CONHCH}_2$ ), 10.35 (s, 1H,  $\text{CONHO}$ ).  $^{13}\text{C}$  NMR (100 MHz,  $\text{DMSO-}d_6$ )  $\delta$  171.26, 170.64, 170.38, 167.53, 160.85 (d,  $J = 241,5$  Hz), 141.20, 134.15, 133.78 (d,  $J = 3,4$  Hz), 133.16, 130.91 (d,  $J = 7,4$  Hz), 130.75, 128.41, 128.25, 128.05, 127.43, 126.15, 125.81, 125.71, 125.33, 125.31, 123.38, 114.62 (d,  $J = 20,7$  Hz), 80.50, 54.22, 49.49, 40.12, 36.73, 36.34, 34.59, 30.90, 26.18. HRMS ( $m/z$ ) (ESI): calcd for  $\text{C}_{37}\text{H}_{41}\text{FN}_4\text{O}_5$  [ $\text{M-H}$ ] $^-$ : 639.2988, found: 639.2996. Melting point: 222.3 – 224.5  $^\circ\text{C}$ . Purity by HPLC: 98%.

## 6. Selected $^1\text{H}$ and $^{13}\text{C}$ NMR spectra

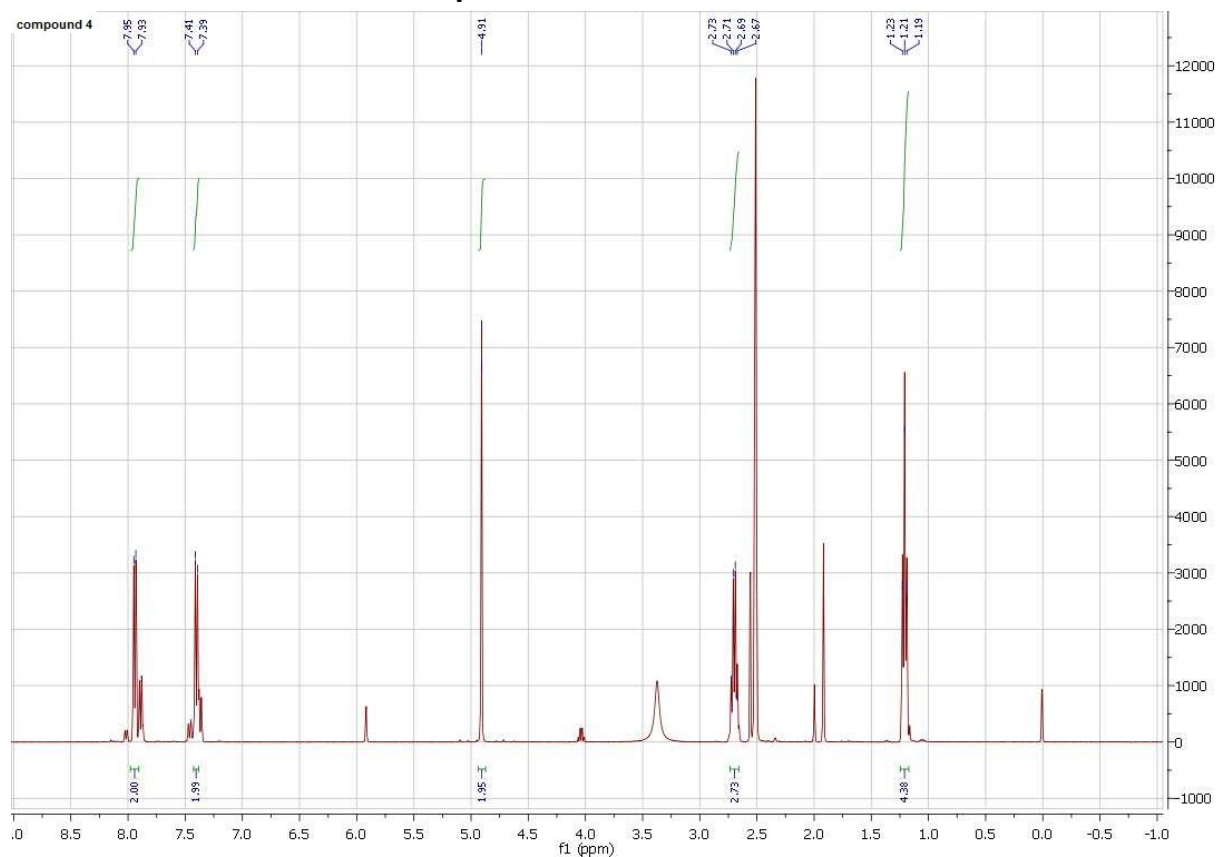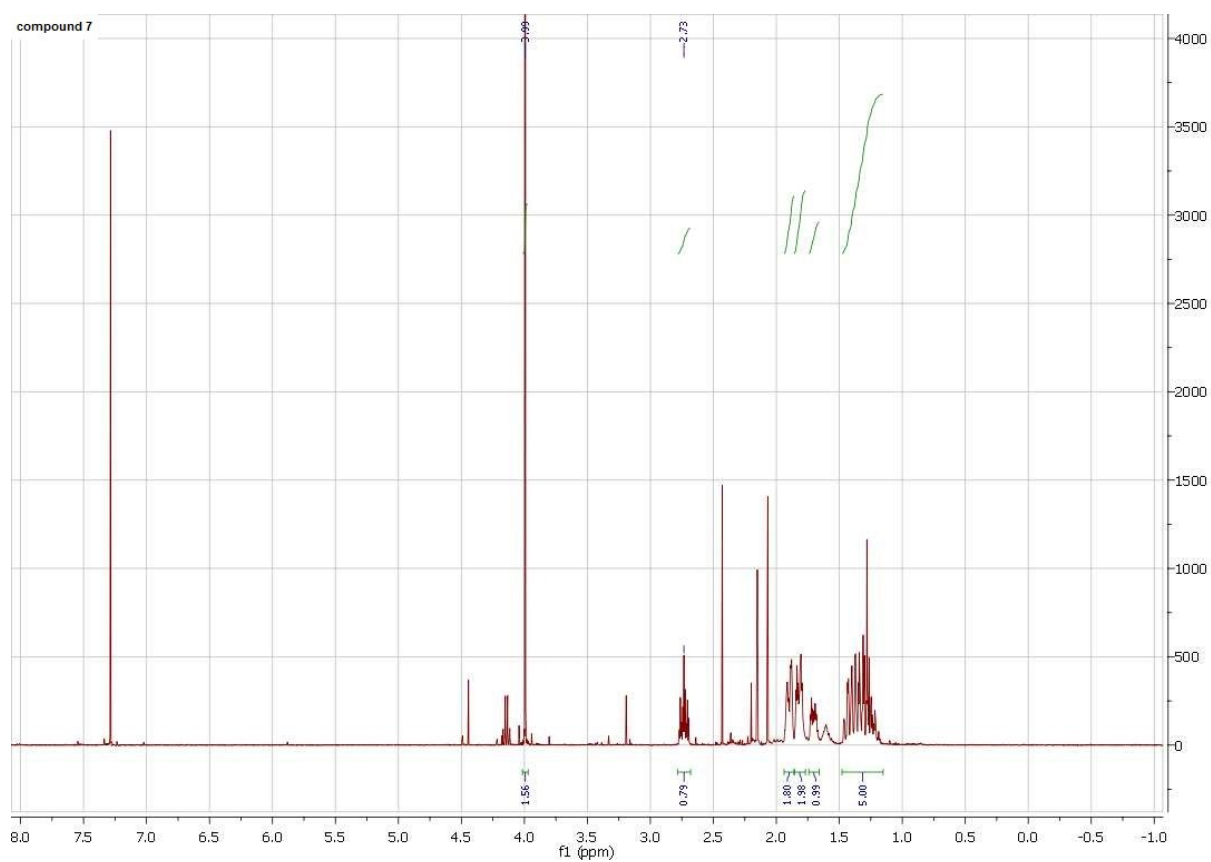

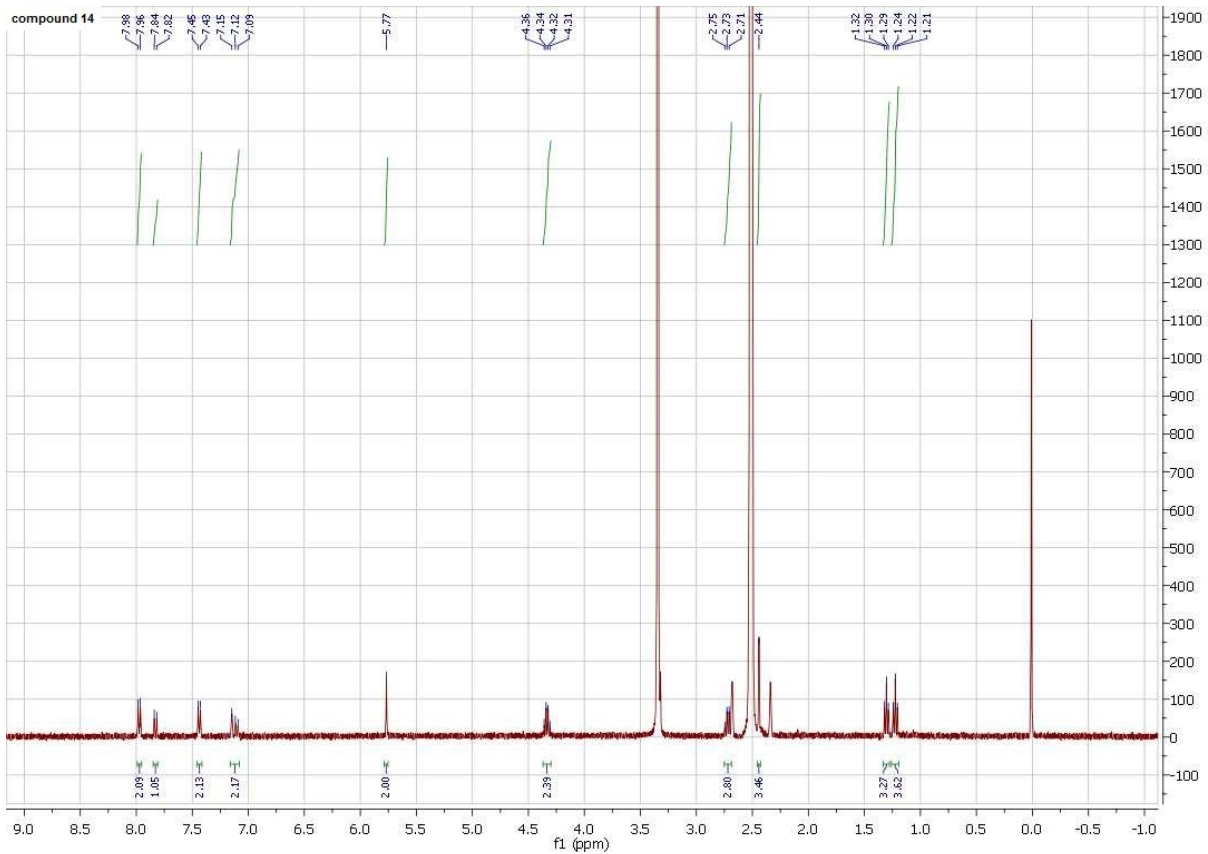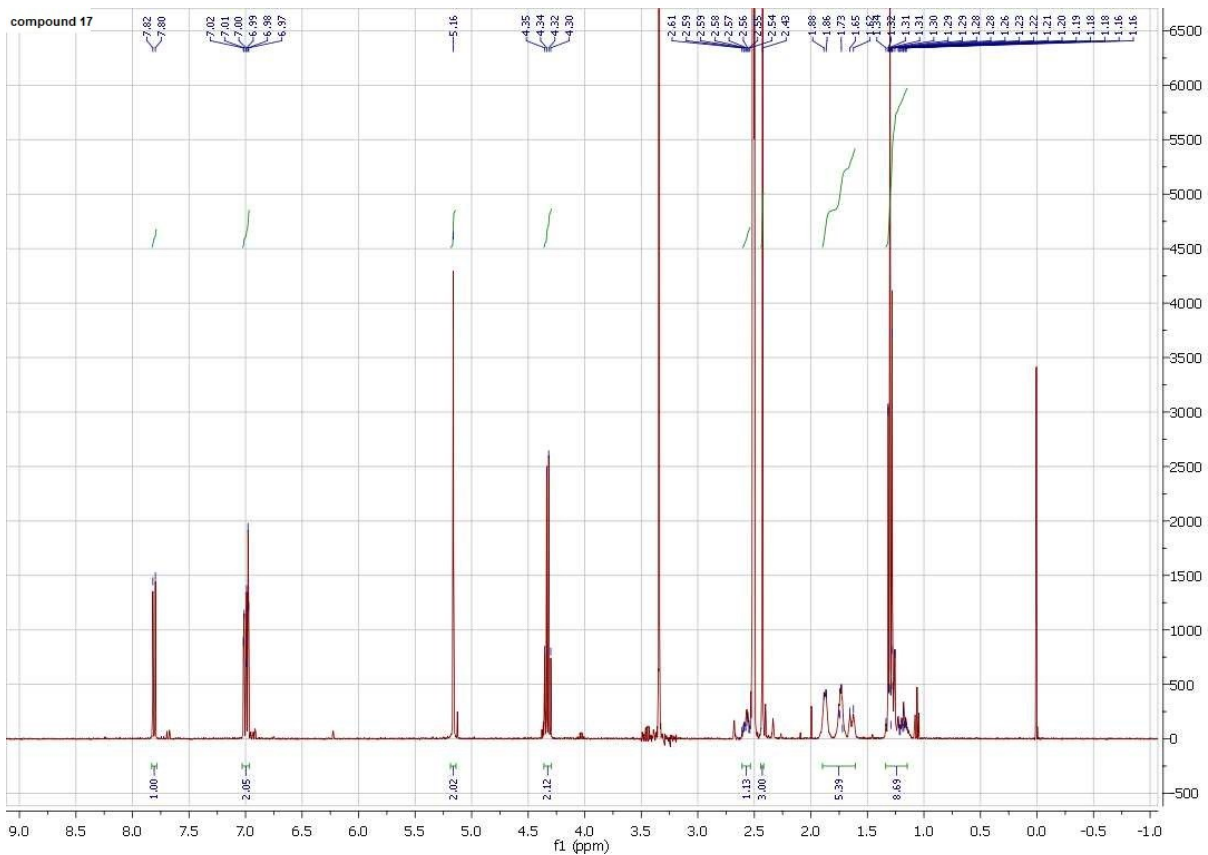

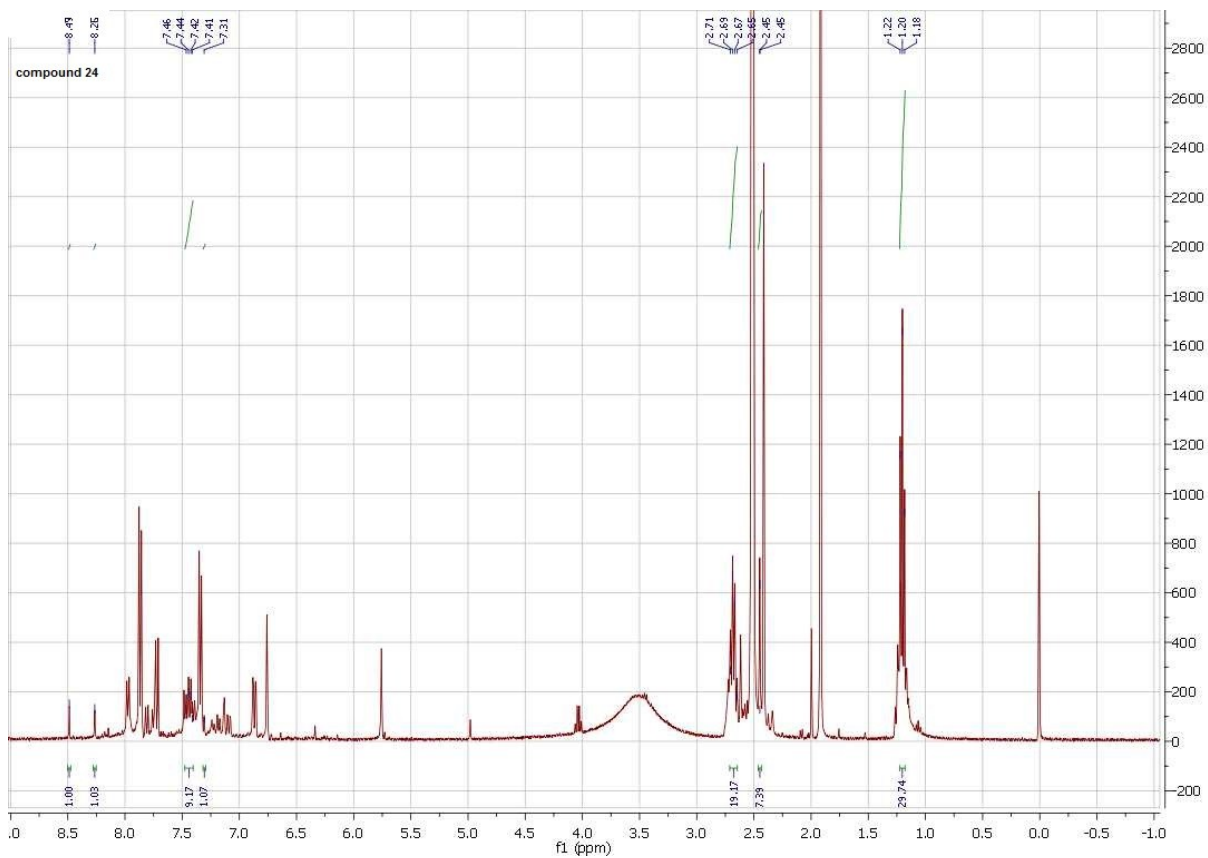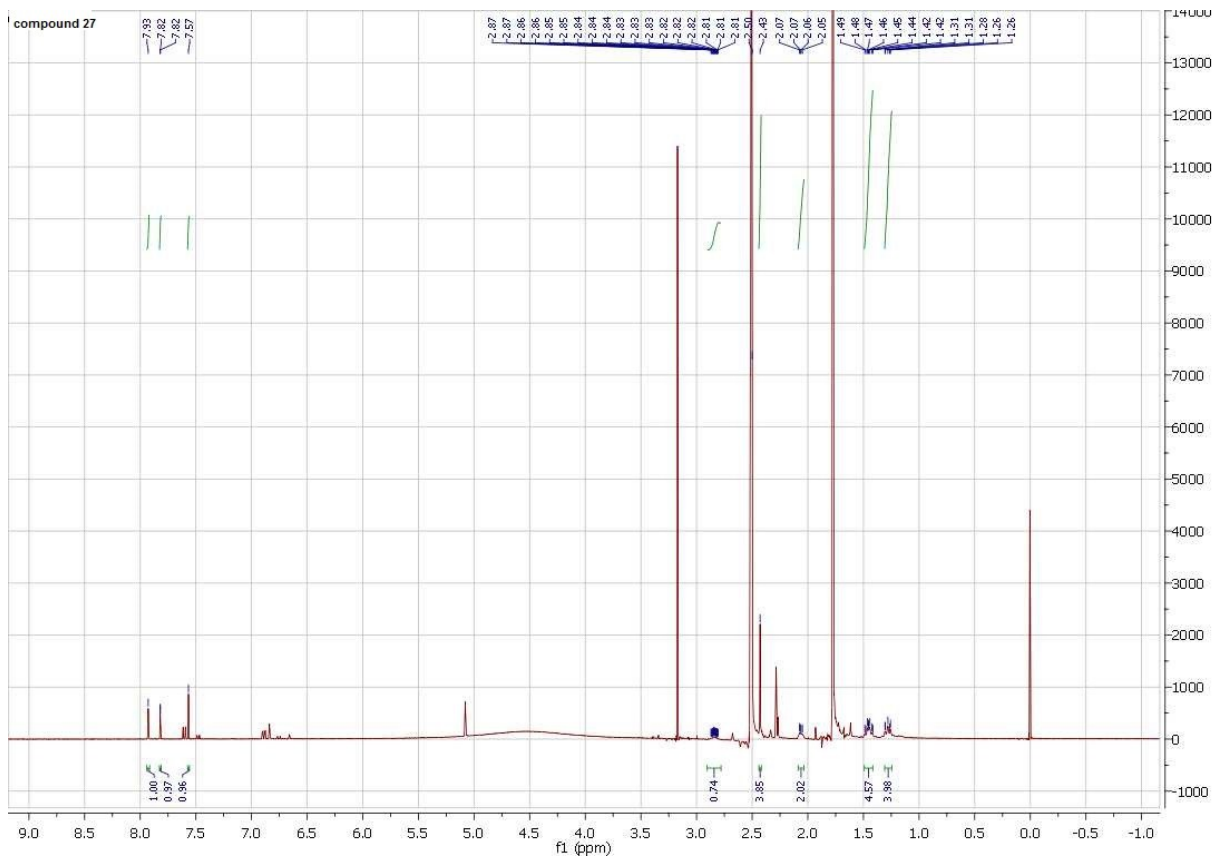





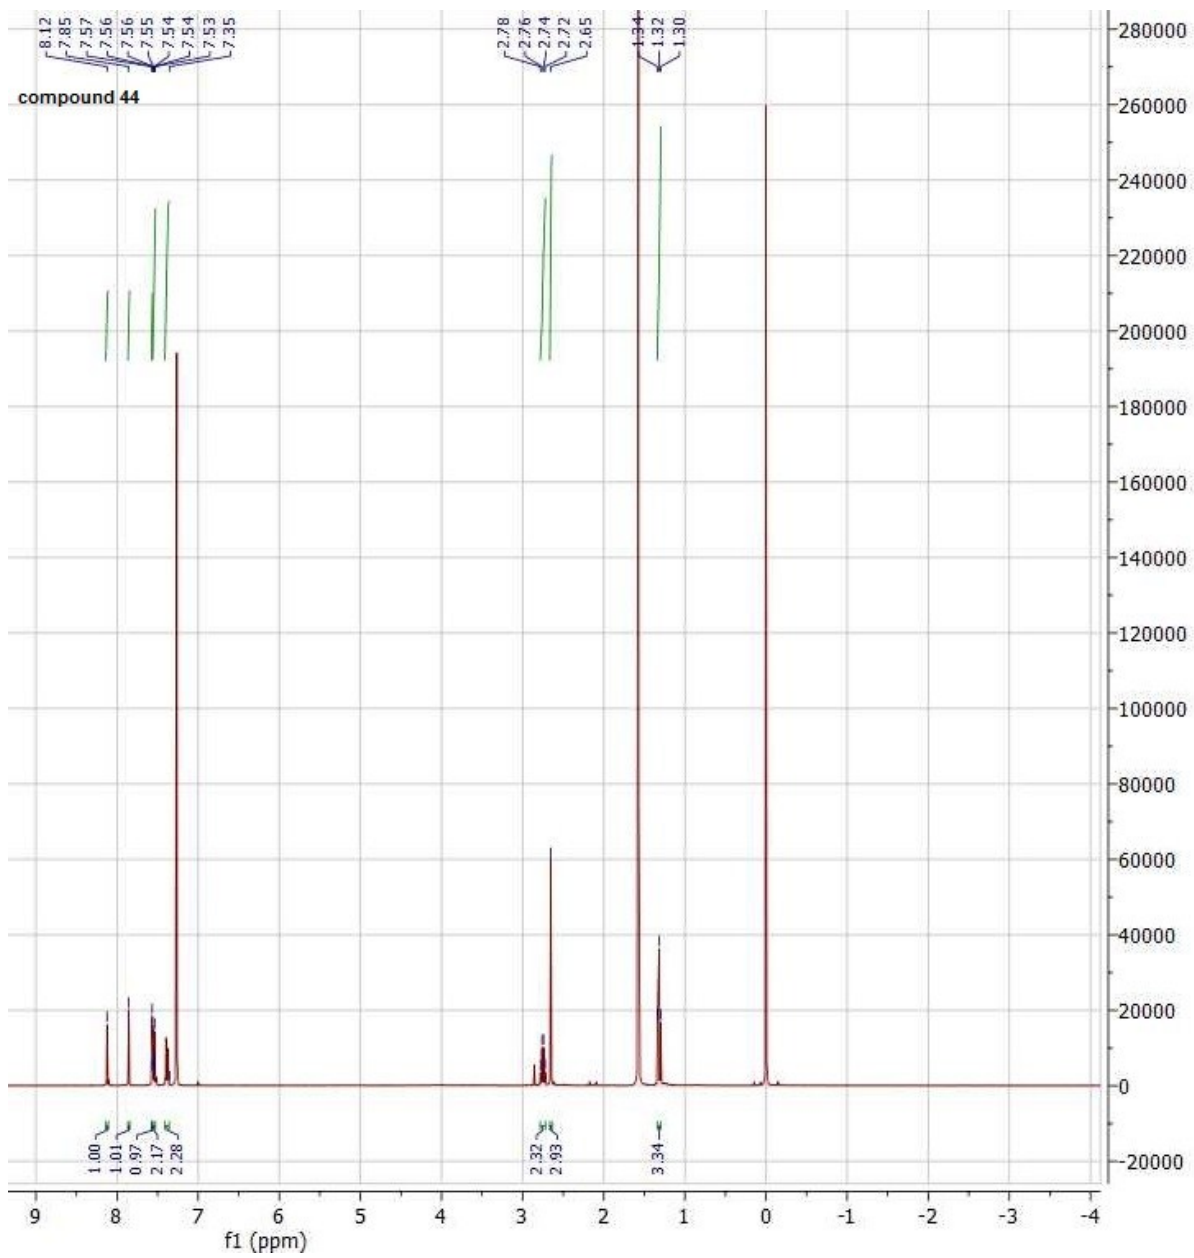

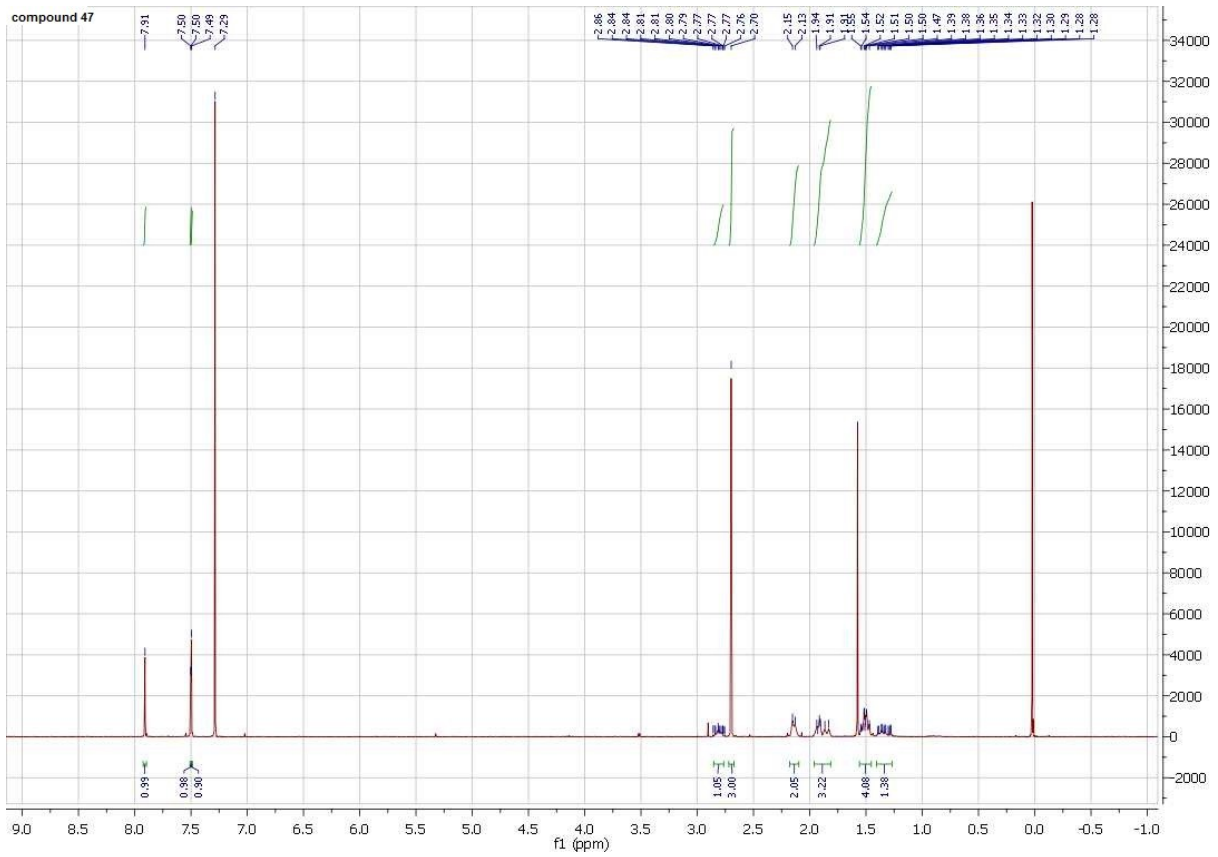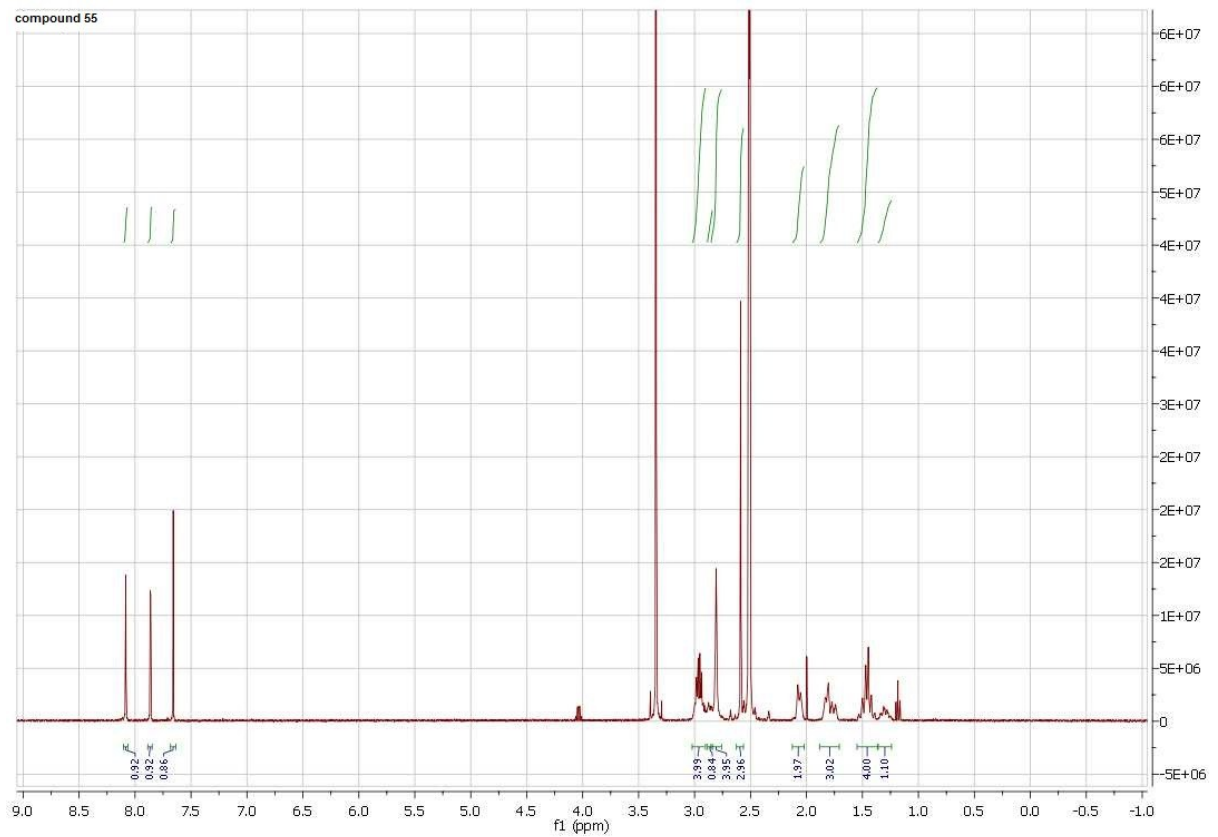

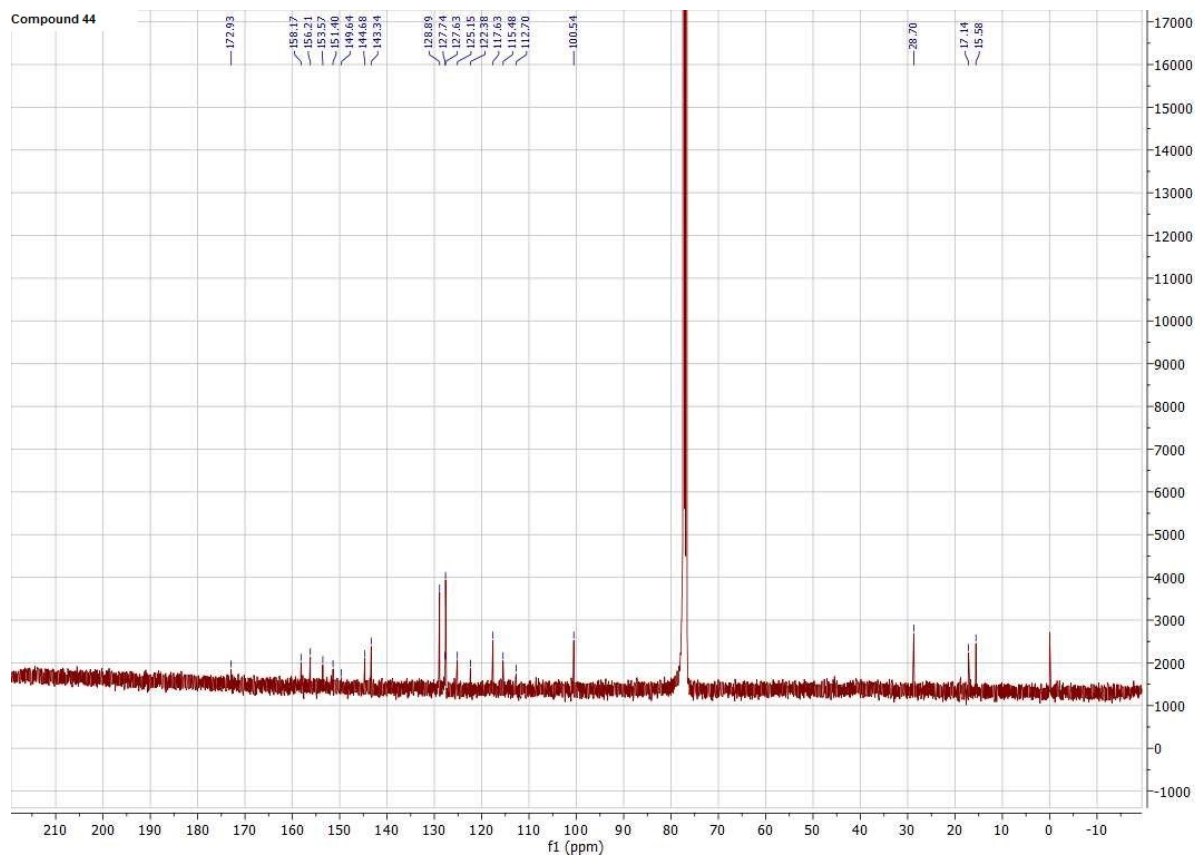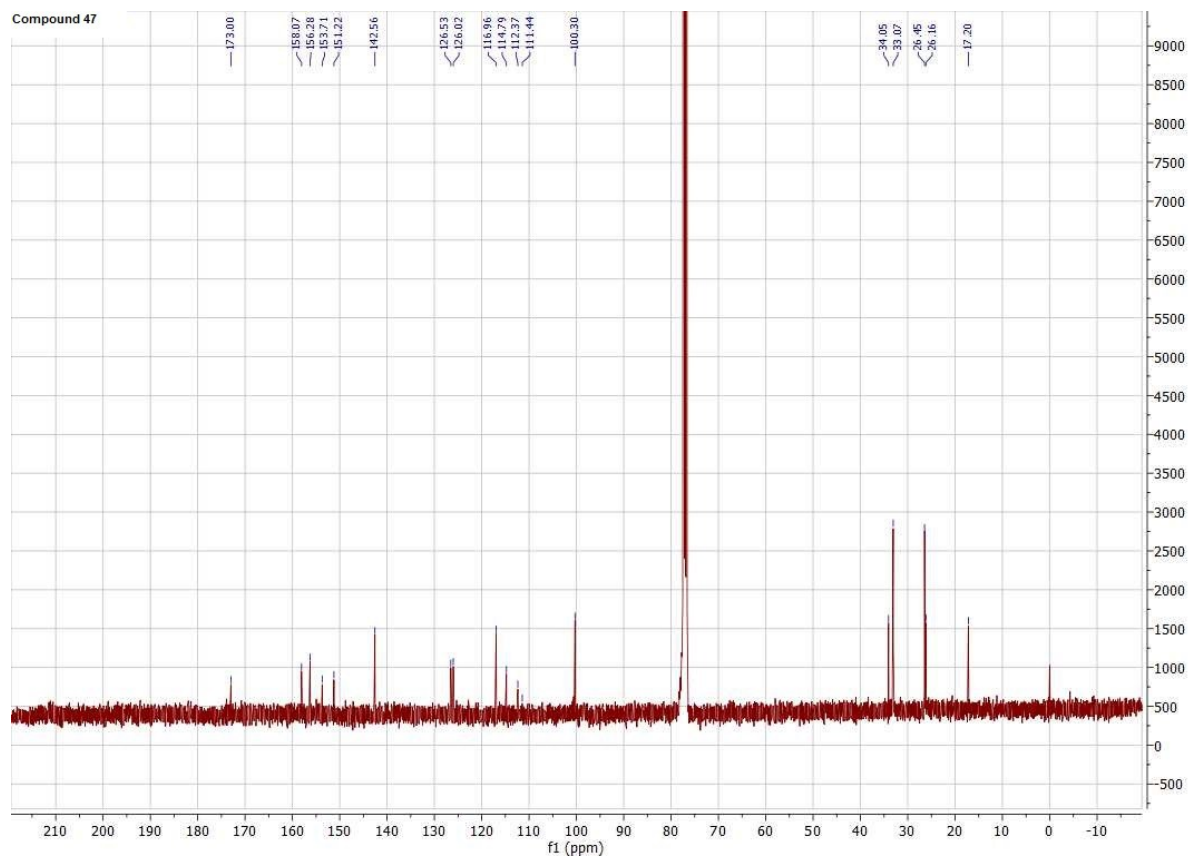

compound 55

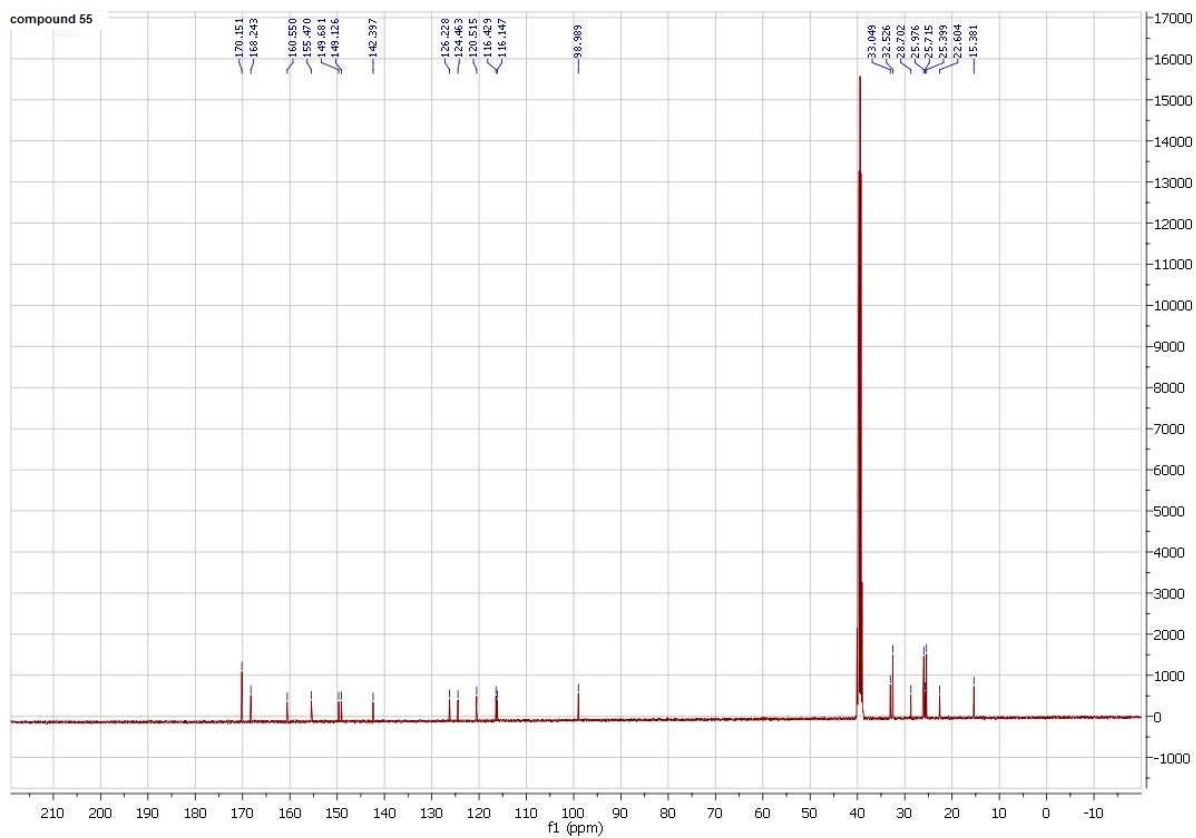

## 7. Selected HRMS spectra

### Compound 44:

GES-172-B #48 RT: 0.21 AV: 1 NL: 1.21E7  
T: FTMS + c ESI Full ms [100.0000-750.0000]

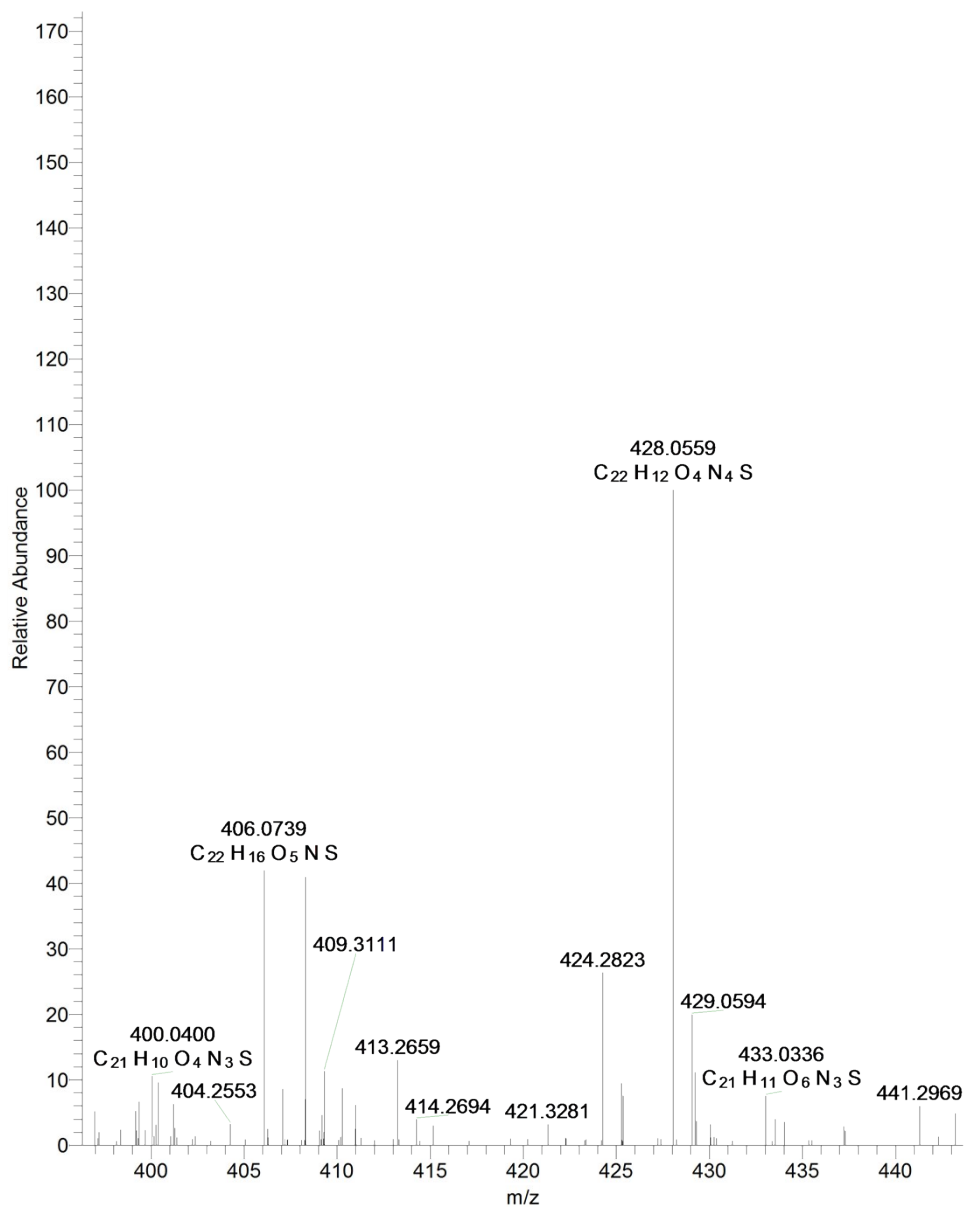

Elemental composition search on mass 406.0738

m/z= 401.0738-411.0738

| m/z       | Theo. Mass | Delta (ppm) | RDB equiv. | Composition                                                     |
|-----------|------------|-------------|------------|-----------------------------------------------------------------|
| 406.07385 | 406.07437  | -1.28       | 15.5       | C <sub>22</sub> H <sub>16</sub> O <sub>5</sub> N <sub>5</sub> S |
|           | 406.07303  | 2.03        | 16.0       | C <sub>20</sub> H <sub>14</sub> O <sub>4</sub> N <sub>4</sub> S |

## Compound 47:

GES-55 #1 RT: 0.00 AV: 1 NL: 3.87E7  
T: FTMS + c ESI Full ms [100.0000-750.0000]

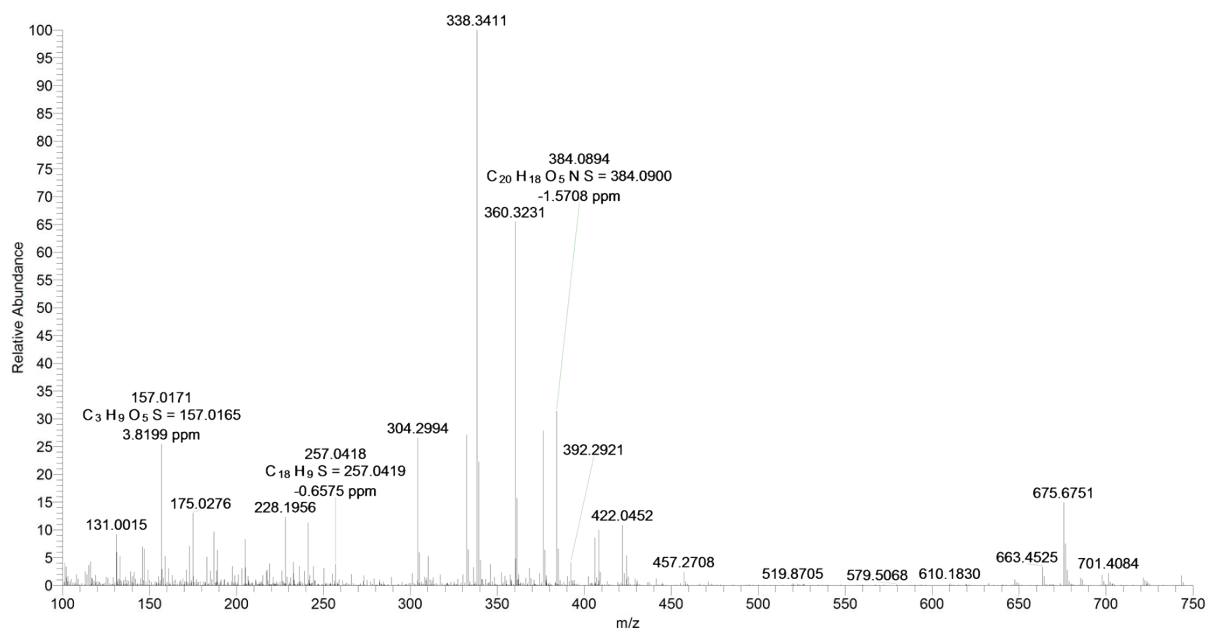

Elemental composition search on mass 384.0894

m/z = 379.0894–389.0894

| m/z       | Theo. Mass | Delta (ppm) | RDB equiv. | Composition                                                     |
|-----------|------------|-------------|------------|-----------------------------------------------------------------|
| 384.08942 | 384.09002  | -1.56       | 12.5       | C <sub>20</sub> H <sub>18</sub> O <sub>5</sub> N <sub>5</sub> S |
|           | 384.08868  | 1.93        | 13.0       | C <sub>18</sub> H <sub>16</sub> O <sub>4</sub> N <sub>4</sub> S |

## 8. Selected HPLC spectra

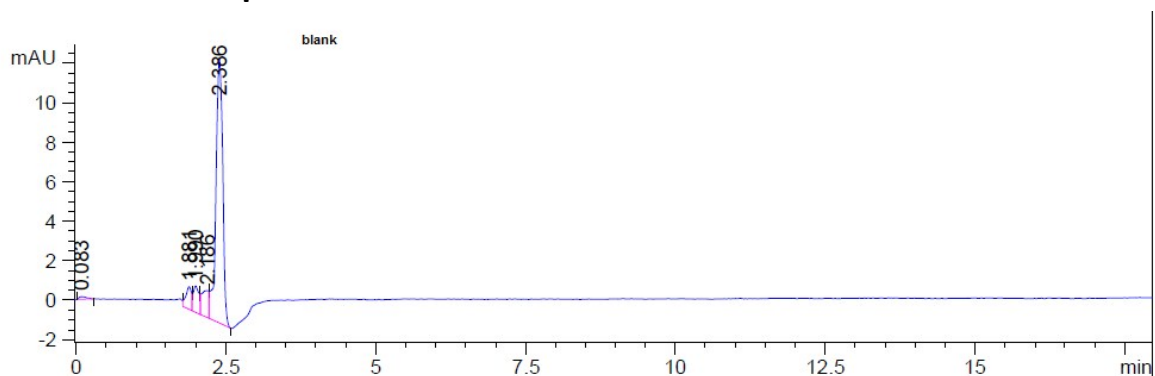

Signal 1: MWD1 B, Sig=254,16 Ref=off

| Peak # | RetTime [min] | Type | Width [min] | Area [mAU*s] | Height [mAU] | Area %  |
|--------|---------------|------|-------------|--------------|--------------|---------|
| 1      | 0.083         | BB   | 0.1285      | 1.35758      | 1.40775e-1   | 1.0154  |
| 2      | 1.881         | BV   | 0.0950      | 7.54493      | 1.14312      | 5.6431  |
| 3      | 1.990         | VV   | 0.0957      | 9.32327      | 1.33096      | 6.9732  |
| 4      | 2.186         | VV   | 0.1210      | 11.07483     | 1.36023      | 8.2833  |
| 5      | 2.386         | VV   | 0.1288      | 104.40067    | 13.42113     | 78.0850 |

Totals : 133.70129 17.39621

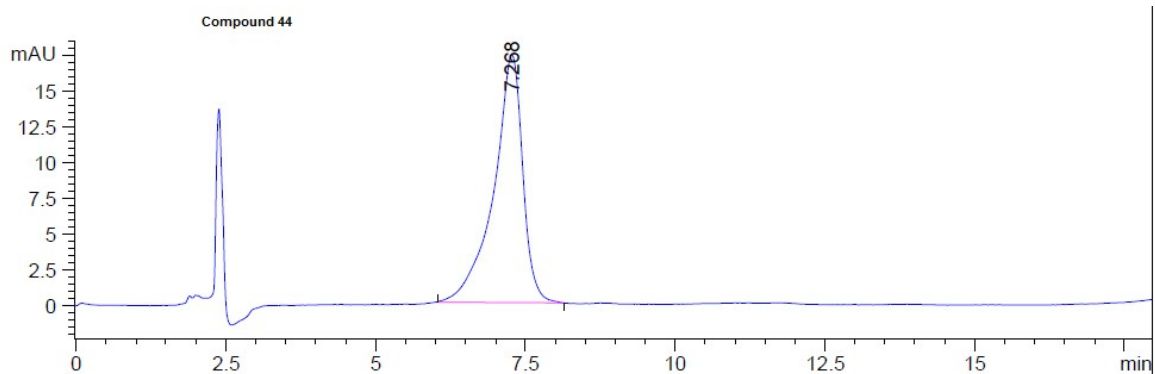

Signal 1: MWD1 B, Sig=254,16 Ref=off

| Peak # | RetTime [min] | Type | Width [min] | Area [mAU*s] | Height [mAU] | Area %   |
|--------|---------------|------|-------------|--------------|--------------|----------|
| 1      | 7.268         | BB   | 0.4871      | 588.59668    | 17.37942     | 100.0000 |

Totals : 588.59668 17.37942

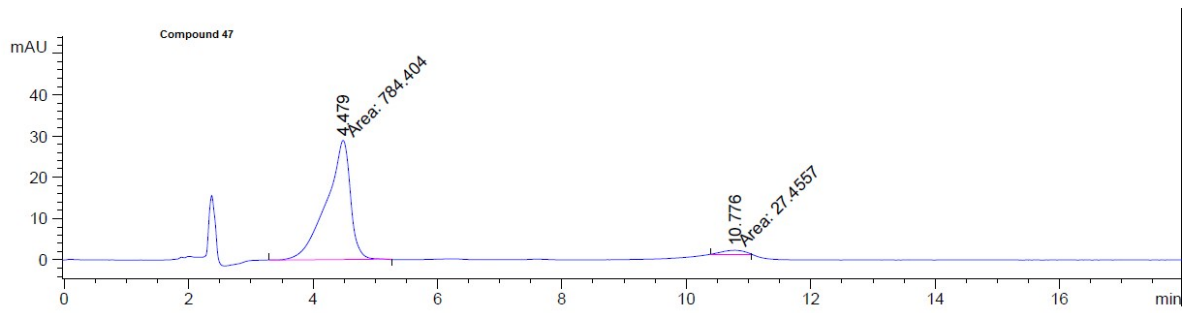

Signal 1: MWD1 B, Sig=254,16 Ref=off

| Peak #   | RetTime [min] | Type | Width [min] | Area [mAU*s] | Height [mAU] | Area %  |
|----------|---------------|------|-------------|--------------|--------------|---------|
| 1        | 4.479         | MM   | 0.4512      | 784.40399    | 28.97399     | 96.6182 |
| 2        | 10.776        | MM   | 0.4305      | 27.45573     | 1.06283      | 3.3818  |
| Totals : |               |      |             | 811.85972    | 30.03682     |         |



## 9. Parameters to evaluate pharmacokinetics and drug-likeness and predicted water solubility

|                                                                                                                                                                                                                                                                                   | Physicochemical Properties |                      |                       |                    |                       | Lipophilicity                                                                                                                                                                                                                                                                |                                    | Water Solubility                                                                                                         |                                                                                                                      |                                                                                                                      |
|-----------------------------------------------------------------------------------------------------------------------------------------------------------------------------------------------------------------------------------------------------------------------------------|----------------------------|----------------------|-----------------------|--------------------|-----------------------|------------------------------------------------------------------------------------------------------------------------------------------------------------------------------------------------------------------------------------------------------------------------------|------------------------------------|--------------------------------------------------------------------------------------------------------------------------|----------------------------------------------------------------------------------------------------------------------|----------------------------------------------------------------------------------------------------------------------|
|                                                                                                                                                                                                                                                                                   | Frac. Csp3                 | Num. rotatable bonds | Num. H-bond acceptors | Num. H-bond donors | TPSA <sup>[3]</sup>   | Log $P_{o/w}$                                                                                                                                                                                                                                                                | Cons. Log $P_{o/w}$ <sup>[9]</sup> | ESOL <sup>[10]</sup>                                                                                                     | Ali <sup>[12]</sup>                                                                                                  | SILICOS-IT <sup>[14]</sup>                                                                                           |
| 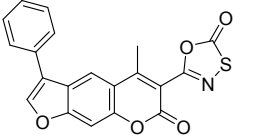 <p>Chemical Formula: C<sub>20</sub>H<sub>11</sub>NO<sub>5</sub>S<br/>Molecular Weight: 377,37</p>  <p>[2]</p> | 0,05                       | 2                    | 6                     | 0                  | 114,69 Å <sup>2</sup> | Log $P_{o/w}$<br>(iLOGP) <sup>[4]</sup> = 2,93<br><br>Log $P_{o/w}$<br>(XLOGP3) <sup>[5]</sup> = 4,28<br><br>Log $P_{o/w}$<br>(WLOGP) <sup>[6]</sup> = 4,59<br><br>Log $P_{o/w}$<br>(MLOGP) <sup>[7]</sup> = 2,27<br><br>Log $P_{o/w}$<br>(SILICOS-IT) <sup>[8]</sup> = 5,95 | 4,00                               | Log S = -5,40<br><br>Solubility = 1,50e-03 mg/ml ;<br>3,96e-06 mol/l<br><br>Class: <sup>[11]</sup><br>Moderately Soluble | Log S = -6,40<br><br>Solubility = 1,50e-04 mg/ml ;<br>3,97e-07 mol/l<br><br>Class: <sup>[13]</sup><br>Poorly Soluble | Log S = -8,30<br><br>Solubility = 1,90e-06 mg/ml ;<br>5,05e-09 mol/l<br><br>Class: <sup>[15]</sup><br>Poorly Soluble |

|                                                                                                                                                                                                                                                                         |      |   |   |   |                          |                                                                                                                                                                                                                                                  |      |                                                                                                           |                                                                                                       |                                                                                                       |
|-------------------------------------------------------------------------------------------------------------------------------------------------------------------------------------------------------------------------------------------------------------------------|------|---|---|---|--------------------------|--------------------------------------------------------------------------------------------------------------------------------------------------------------------------------------------------------------------------------------------------|------|-----------------------------------------------------------------------------------------------------------|-------------------------------------------------------------------------------------------------------|-------------------------------------------------------------------------------------------------------|
| 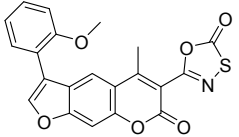 <p>Chemical Formula: C<sub>21</sub>H<sub>13</sub>NO<sub>6</sub>S<br/>Molecular Weight: 407,40</p>    | 0,10 | 3 | 7 | 0 | 123,92<br>Å <sup>2</sup> | <p>Log <math>P_{o/w}</math> (iLOGP) = 3,40</p> <p>Log <math>P_{o/w}</math> (XLOGP3) = 4,25</p> <p>Log <math>P_{o/w}</math> (WLOGP) = 4,60</p> <p>Log <math>P_{o/w}</math> (MLOGP) = 1,96</p> <p>Log <math>P_{o/w}</math> (SILICOS-IT) = 5,99</p> | 4,04 | <p>Log S = -5,46</p> <p>Solubility = 1,42e-03 mg/ml ; 3,49e-06 mol/l</p> <p>Class: Moderately Soluble</p> | <p>Log S = -6,56</p> <p>Solubility = 1,11e-04 mg/ml ; 2,73e-07 mol/l</p> <p>Class: Poorly Soluble</p> | <p>Log S = -8,40</p> <p>Solubility = 1,62e-06 mg/ml ; 3,98e-09 mol/l</p> <p>Class: Poorly Soluble</p> |
|  <p>Chemical Formula: C<sub>21</sub>H<sub>13</sub>NO<sub>6</sub>S<br/>Molecular Weight: 407,40</p>  | 0,10 | 3 | 7 | 0 | 123,92<br>Å <sup>2</sup> | <p>Log <math>P_{o/w}</math> (iLOGP) = 3,37</p> <p>Log <math>P_{o/w}</math> (XLOGP3) = 4,25</p> <p>Log <math>P_{o/w}</math> (WLOGP) = 4,60</p> <p>Log <math>P_{o/w}</math> (MLOGP) = 1,96</p> <p>Log <math>P_{o/w}</math> (SILICOS-IT) = 5,99</p> | 4,03 | <p>Log S = -5,46</p> <p>Solubility = 1,42e-03 mg/ml ; 3,49e-06 mol/l</p> <p>Class: Moderately Soluble</p> | <p>Log S = -6,56</p> <p>Solubility = 1,11e-04 mg/ml ; 2,73e-07 mol/l</p> <p>Class: Poorly Soluble</p> | <p>Log S = -8,40</p> <p>Solubility = 1,62e-06 mg/ml ; 3,98e-09 mol/l</p> <p>Class: Poorly Soluble</p> |

|                                                                                                                                                                                                                                                                             |      |   |   |   |                          |                                                                                                                                                                                                                                                  |      |                                                                                                           |                                                                                                       |                                                                                                       |
|-----------------------------------------------------------------------------------------------------------------------------------------------------------------------------------------------------------------------------------------------------------------------------|------|---|---|---|--------------------------|--------------------------------------------------------------------------------------------------------------------------------------------------------------------------------------------------------------------------------------------------|------|-----------------------------------------------------------------------------------------------------------|-------------------------------------------------------------------------------------------------------|-------------------------------------------------------------------------------------------------------|
| 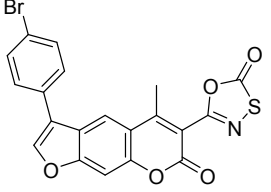 <p>Chemical Formula:<br/>C<sub>20</sub>H<sub>10</sub>BrNO<sub>5</sub>S<br/>Molecular Weight: 456,27</p>  | 0,05 | 2 | 6 | 0 | 114,69<br>Å <sup>2</sup> | <p>Log <math>P_{o/w}</math> (iLOGP) = 3,38</p> <p>Log <math>P_{o/w}</math> (XLOGP3) = 4,97</p> <p>Log <math>P_{o/w}</math> (WLOGP) = 5,35</p> <p>Log <math>P_{o/w}</math> (MLOGP) = 2,87</p> <p>Log <math>P_{o/w}</math> (SILICOS-IT) = 6,62</p> | 4,64 | <p>Log S = -6,30</p> <p>Solubility = 2,28e-04 mg/ml ; 4,99e-07 mol/l</p> <p>Class: Poorly Soluble</p>     | <p>Log S = -7,12</p> <p>Solubility = 3,48e-05 mg/ml ; 7,64e-08 mol/l</p> <p>Class: Poorly Soluble</p> | <p>Log S = -9,08</p> <p>Solubility = 3,81e-07 mg/ml ; 8,36e-10 mol/l</p> <p>Class: Poorly Soluble</p> |
|  <p>Chemical Formula: C<sub>20</sub>H<sub>10</sub>FNO<sub>5</sub>S<br/>Molecular Weight: 395,36</p>    | 0,05 | 2 | 7 | 0 | 114,69<br>Å <sup>2</sup> | <p>Log <math>P_{o/w}</math> (iLOGP) = 3,10</p> <p>Log <math>P_{o/w}</math> (XLOGP3) = 4,38</p> <p>Log <math>P_{o/w}</math> (WLOGP) = 5,15</p> <p>Log <math>P_{o/w}</math> (MLOGP) = 2,65</p> <p>Log <math>P_{o/w}</math></p>                     | 4,33 | <p>Log S = -5,55</p> <p>Solubility = 1,11e-03 mg/ml ; 2,80e-06 mol/l</p> <p>Class: Moderately Soluble</p> | <p>Log S = -6,50</p> <p>Solubility = 1,24e-04 mg/ml ; 3,13e-07 mol/l</p> <p>Class: Poorly Soluble</p> | <p>Log S = -8,56</p> <p>Solubility = 1,08e-06 mg/ml ; 2,74e-09 mol/l</p> <p>Class: Poorly Soluble</p> |

|                                                                                                                                                                                                                                                                                  |      |   |   |   |                          |                                                                                                                                                                                                                              |      |                                                                                            |                                                                                        |                                                                                        |
|----------------------------------------------------------------------------------------------------------------------------------------------------------------------------------------------------------------------------------------------------------------------------------|------|---|---|---|--------------------------|------------------------------------------------------------------------------------------------------------------------------------------------------------------------------------------------------------------------------|------|--------------------------------------------------------------------------------------------|----------------------------------------------------------------------------------------|----------------------------------------------------------------------------------------|
| 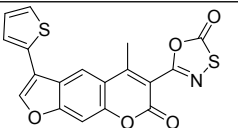 <p>Chemical Formula: C<sub>18</sub>H<sub>9</sub>NO<sub>5</sub>S<sub>2</sub><br/>Molecular Weight: 383,39</p>  | 0,06 | 2 | 6 | 0 | 142,93<br>Å <sup>2</sup> | (SILICOS-IT) = 6,36<br>Log P <sub>o/w</sub> (iLOGP) = 2,95<br>Log P <sub>o/w</sub> (XLOGP3) = 4,00<br>Log P <sub>o/w</sub> (WLOGP) = 4,65<br>Log P <sub>o/w</sub> (MLOGP) = 1,84<br>Log P <sub>o/w</sub> (SILICOS-IT) = 6,59 | 4,01 | Log S = -5,26<br>Solubility = 2,11e-03 mg/ml ; 5,50e-06 mol/l<br>Class: Moderately Soluble | Log S = -6,70<br>Solubility = 7,59e-05 mg/ml ; 1,98e-07 mol/l<br>Class: Poorly Soluble | Log S = -7,56<br>Solubility = 1,05e-05 mg/ml ; 2,74e-08 mol/l<br>Class: Poorly Soluble |
|  <p>Chemical Formula: C<sub>21</sub>H<sub>13</sub>NO<sub>5</sub>S<br/>Molecular Weight: 391,40</p>           | 0,10 | 2 | 6 | 0 | 114,69<br>Å <sup>2</sup> | Log P <sub>o/w</sub> (iLOGP) = 3,31<br>Log P <sub>o/w</sub> (XLOGP3) = 4,65<br>Log P <sub>o/w</sub> (WLOGP) = 4,90<br>Log P <sub>o/w</sub> (MLOGP) = 2,49<br>Log P <sub>o/w</sub> (SILICOS-IT) = 6,46                        | 4,36 | Log S = -5,70<br>Solubility = 7,84e-04 mg/ml ; 2,00e-06 mol/l<br>Class: Moderately Soluble | Log S = -6,78<br>Solubility = 6,42e-05 mg/ml ; 1,64e-07 mol/l<br>Class: Poorly Soluble | Log S = -8,67<br>Solubility = 8,31e-07 mg/ml ; 2,12e-09 mol/l<br>Class: Poorly Soluble |

|                                                                                                                                                                                                                                                                        |      |   |   |   |                          |                                                                                                                                                                                                                                                  |      |                                                                                                           |                                                                                                       |                                                                                                       |
|------------------------------------------------------------------------------------------------------------------------------------------------------------------------------------------------------------------------------------------------------------------------|------|---|---|---|--------------------------|--------------------------------------------------------------------------------------------------------------------------------------------------------------------------------------------------------------------------------------------------|------|-----------------------------------------------------------------------------------------------------------|-------------------------------------------------------------------------------------------------------|-------------------------------------------------------------------------------------------------------|
| 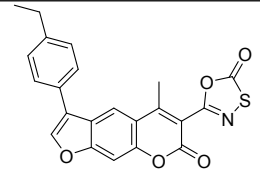 <p>Chemical Formula: C<sub>22</sub>H<sub>15</sub>NO<sub>5</sub>S<br/>Molecular Weight: 405,42</p>   | 0,14 | 3 | 6 | 0 | 114,69<br>Å <sup>2</sup> | <p>Log <math>P_{o/w}</math> (iLOGP) = 3,51</p> <p>Log <math>P_{o/w}</math> (XLOGP3) = 5,08</p> <p>Log <math>P_{o/w}</math> (WLOGP) = 5,15</p> <p>Log <math>P_{o/w}</math> (MLOGP) = 2,71</p> <p>Log <math>P_{o/w}</math> (SILICOS-IT) = 6,84</p> | 4,66 | <p>Log S = -5,97</p> <p>Solubility = 4,36e-04 mg/ml ; 1,08e-06 mol/l</p> <p>Class: Moderately Soluble</p> | <p>Log S = -7,23</p> <p>Solubility = 2,38e-05 mg/ml ; 5,87e-08 mol/l</p> <p>Class: Poorly Soluble</p> | <p>Log S = -9,07</p> <p>Solubility = 3,48e-07 mg/ml ; 8,59e-10 mol/l</p> <p>Class: Poorly Soluble</p> |
|  <p>Chemical Formula: C<sub>18</sub>H<sub>13</sub>NO<sub>5</sub>S<br/>Molecular Weight: 355,42</p>  | 0,28 | 2 | 6 | 0 | 114,69<br>Å <sup>2</sup> | <p>Log <math>P_{o/w}</math> (iLOGP) = 2,91</p> <p>Log <math>P_{o/w}</math> (XLOGP3) = 4,11</p> <p>Log <math>P_{o/w}</math> (WLOGP) = 4,19</p> <p>Log <math>P_{o/w}</math> (MLOGP) = 2,02</p> <p>Log <math>P_{o/w}</math> (SILICOS-IT) = 5,60</p> | 3,76 | <p>Log S = -5,03</p> <p>Solubility = 3,29e-03 mg/ml ; 9,26e-06 mol/l</p> <p>Class: Moderately Soluble</p> | <p>Log S = -6,22</p> <p>Solubility = 2,12e-04 mg/ml ; 5,96e-07 mol/l</p> <p>Class: Poorly Soluble</p> | <p>Log S = -6,67</p> <p>Solubility = 7,51e-05 mg/ml ; 2,11e-07 mol/l</p> <p>Class: Poorly Soluble</p> |

|                                                                                                                                                                                                                                                                        |      |   |   |   |                          |                                                                                                                                                                                                                                                  |      |                                                                                                           |                                                                                                       |                                                                                                       |
|------------------------------------------------------------------------------------------------------------------------------------------------------------------------------------------------------------------------------------------------------------------------|------|---|---|---|--------------------------|--------------------------------------------------------------------------------------------------------------------------------------------------------------------------------------------------------------------------------------------------|------|-----------------------------------------------------------------------------------------------------------|-------------------------------------------------------------------------------------------------------|-------------------------------------------------------------------------------------------------------|
| 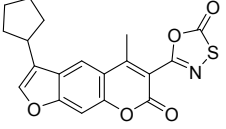 <p>Chemical Formula: C<sub>19</sub>H<sub>15</sub>NO<sub>5</sub>S<br/>Molecular Weight: 369,39</p>   | 0,32 | 2 | 6 | 0 | 114,69<br>Å <sup>2</sup> | <p>Log <math>P_{o/w}</math> (iLOGP) = 3,17</p> <p>Log <math>P_{o/w}</math> (XLOGP3) = 4,65</p> <p>Log <math>P_{o/w}</math> (WLOGP) = 4,58</p> <p>Log <math>P_{o/w}</math> (MLOGP) = 2,25</p> <p>Log <math>P_{o/w}</math> (SILICOS-IT) = 5,82</p> | 4,10 | <p>Log S = -5,44</p> <p>Solubility = 1,34e-03 mg/ml ; 3,63e-06 mol/l</p> <p>Class: Moderately Soluble</p> | <p>Log S = -6,78</p> <p>Solubility = 6,06e-05 mg/ml ; 1,64e-07 mol/l</p> <p>Class: Poorly Soluble</p> | <p>Log S = -6,94</p> <p>Solubility = 4,20e-05 mg/ml ; 1,14e-07 mol/l</p> <p>Class: Poorly Soluble</p> |
|  <p>Chemical Formula: C<sub>20</sub>H<sub>17</sub>NO<sub>5</sub>S<br/>Molecular Weight: 383,42</p>  | 0,35 | 2 | 6 | 0 | 114,69<br>Å <sup>2</sup> | <p>Log <math>P_{o/w}</math> (iLOGP) = 3,31</p> <p>Log <math>P_{o/w}</math> (XLOGP3) = 5,19</p> <p>Log <math>P_{o/w}</math> (WLOGP) = 4,97</p> <p>Log <math>P_{o/w}</math> (MLOGP) = 2,48</p> <p>Log <math>P_{o/w}</math> (SILICOS-IT) = 6,05</p> | 4,40 | <p>Log S = -5,85</p> <p>Solubility = 5,44e-04 mg/ml ; 1,42e-06 mol/l</p> <p>Class: Moderately Soluble</p> | <p>Log S = -7,35</p> <p>Solubility = 1,73e-05 mg/ml ; 4,51e-08 mol/l</p> <p>Class: Poorly Soluble</p> | <p>Log S = -7,12</p> <p>Solubility = 2,35e-05 mg/ml ; 6,14e-08 mol/l</p> <p>Class: Poorly Soluble</p> |

|                                                                                                                                                                                                                                                                                   |      |   |   |   |                         |                                                                                                                                                                                                                                                  |      |                                                                                                               |                                                                                                               |                                                                                                           |
|-----------------------------------------------------------------------------------------------------------------------------------------------------------------------------------------------------------------------------------------------------------------------------------|------|---|---|---|-------------------------|--------------------------------------------------------------------------------------------------------------------------------------------------------------------------------------------------------------------------------------------------|------|---------------------------------------------------------------------------------------------------------------|---------------------------------------------------------------------------------------------------------------|-----------------------------------------------------------------------------------------------------------|
| 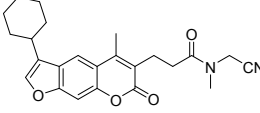 <p>Chemical Formula: C<sub>24</sub>H<sub>26</sub>N<sub>2</sub>O<sub>4</sub><br/>Molecular Weight: 406,48</p>   | 0,46 | 6 | 5 | 0 | 87,45<br>Å <sup>2</sup> | <p>Log <math>P_{o/w}</math> (iLOGP) = 3,50</p> <p>Log <math>P_{o/w}</math> (XLOGP3) = 4,25</p> <p>Log <math>P_{o/w}</math> (WLOGP) = 4,81</p> <p>Log <math>P_{o/w}</math> (MLOGP) = 2,37</p> <p>Log <math>P_{o/w}</math> (SILICOS-IT) = 5,27</p> | 4,04 | <p>Log S = -4,96</p> <p>Solubility = 4,43e-03 mg/ml ;<br/>1,09e-05 mol/l</p> <p>Class: Moderately Soluble</p> | <p>Log S = -5,80</p> <p>Solubility = 6,47e-04 mg/ml ;<br/>1,59e-06 mol/l</p> <p>Class: Moderately Soluble</p> | <p>Log S = -7,21</p> <p>Solubility = 2,48e-05 mg/ml ;<br/>6,11e-08 mol/l</p> <p>Class: Poorly Soluble</p> |
|  <p>Chemical Formula: C<sub>23</sub>H<sub>24</sub>N<sub>2</sub>O<sub>4</sub><br/>Molecular Weight: 392,46</p>  | 0,43 | 6 | 5 | 1 | 96,24<br>Å <sup>2</sup> | <p>Log <math>P_{o/w}</math> (iLOGP) = 3,15</p> <p>Log <math>P_{o/w}</math> (XLOGP3) = 4,07</p> <p>Log <math>P_{o/w}</math> (WLOGP) = 4,47</p> <p>Log <math>P_{o/w}</math> (MLOGP) = 2,16</p> <p>Log <math>P_{o/w}</math> (SILICOS-IT) = 5,31</p> | 3,83 | <p>Log S = -4,77</p> <p>Solubility = 6,62e-03 mg/ml ;<br/>1,69e-05 mol/l</p> <p>Class: Moderately Soluble</p> | <p>Log S = -5,80</p> <p>Solubility = 6,28e-04 mg/ml ;<br/>1,60e-06 mol/l</p> <p>Class: Moderately Soluble</p> | <p>Log S = -7,55</p> <p>Solubility = 1,10e-05 mg/ml ;<br/>2,79e-08 mol/l</p> <p>Class: Poorly Soluble</p> |

|                                                                                                                                                                                                                                                                                   |      |   |   |   |                         |                                                                                                                                                                                                                                                  |      |                                                                                                           |                                                                                                           |                                                                                                       |
|-----------------------------------------------------------------------------------------------------------------------------------------------------------------------------------------------------------------------------------------------------------------------------------|------|---|---|---|-------------------------|--------------------------------------------------------------------------------------------------------------------------------------------------------------------------------------------------------------------------------------------------|------|-----------------------------------------------------------------------------------------------------------|-----------------------------------------------------------------------------------------------------------|-------------------------------------------------------------------------------------------------------|
| 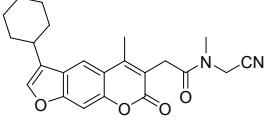 <p>Chemical Formula: C<sub>23</sub>H<sub>24</sub>N<sub>2</sub>O<sub>4</sub><br/>Molecular Weight: 392,46</p>   | 0,43 | 5 | 5 | 0 | 87,45<br>Å <sup>2</sup> | <p>Log <math>P_{o/w}</math> (iLOGP) = 3,50</p> <p>Log <math>P_{o/w}</math> (XLOGP3) = 3,96</p> <p>Log <math>P_{o/w}</math> (WLOGP) = 4,42</p> <p>Log <math>P_{o/w}</math> (MLOGP) = 2,16</p> <p>Log <math>P_{o/w}</math> (SILICOS-IT) = 4,87</p> | 3,78 | <p>Log S = -4,77</p> <p>Solubility = 6,67e-03 mg/ml ; 1,70e-05 mol/l</p> <p>Class: Moderately Soluble</p> | <p>Log S = -5,50</p> <p>Solubility = 1,25e-03 mg/ml ; 3,18e-06 mol/l</p> <p>Class: Moderately Soluble</p> | <p>Log S = -6,82</p> <p>Solubility = 5,93e-05 mg/ml ; 1,51e-07 mol/l</p> <p>Class: Poorly Soluble</p> |
|  <p>Chemical Formula: C<sub>22</sub>H<sub>22</sub>N<sub>2</sub>O<sub>4</sub><br/>Molecular Weight: 378,43</p>  | 0,41 | 5 | 5 | 1 | 96,24<br>Å <sup>2</sup> | <p>Log <math>P_{o/w}</math> (iLOGP) = 2,84</p> <p>Log <math>P_{o/w}</math> (XLOGP3) = 3,77</p> <p>Log <math>P_{o/w}</math> (WLOGP) = 4,08</p> <p>Log <math>P_{o/w}</math> (MLOGP) = 1,95</p> <p>Log <math>P_{o/w}</math> (SILICOS-IT) = 4,92</p> | 3,51 | <p>Log S = -4,57</p> <p>Solubility = 1,01e-02 mg/ml ; 2,66e-05 mol/l</p> <p>Class: Moderately Soluble</p> | <p>Log S = -5,48</p> <p>Solubility = 1,24e-03 mg/ml ; 3,28e-06 mol/l</p> <p>Class: Moderately Soluble</p> | <p>Log S = -7,16</p> <p>Solubility = 2,62e-05 mg/ml ; 6,92e-08 mol/l</p> <p>Class: Poorly Soluble</p> |



|                                                                                                                                                                                                                                                                       |      |   |   |   |                          |                                                                                                                                                                                                                                                  |      |                                                                                                           |                                                                                                           |                                                                                                       |
|-----------------------------------------------------------------------------------------------------------------------------------------------------------------------------------------------------------------------------------------------------------------------|------|---|---|---|--------------------------|--------------------------------------------------------------------------------------------------------------------------------------------------------------------------------------------------------------------------------------------------|------|-----------------------------------------------------------------------------------------------------------|-----------------------------------------------------------------------------------------------------------|-------------------------------------------------------------------------------------------------------|
| 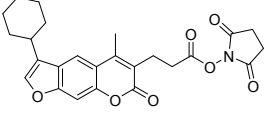 <p>Chemical Formula: C<sub>25</sub>H<sub>25</sub>NO<sub>7</sub><br/>Molecular Weight: 451,48</p>   | 0,44 | 6 | 7 | 0 | 107,03<br>Å <sup>2</sup> | <p>Log <math>P_{o/w}</math> (iLOGP) = 3,74</p> <p>Log <math>P_{o/w}</math> (XLOGP3) = 3,97</p> <p>Log <math>P_{o/w}</math> (WLOGP) = 4,05</p> <p>Log <math>P_{o/w}</math> (MLOGP) = 2,95</p> <p>Log <math>P_{o/w}</math> (SILICOS-IT) = 4,91</p> | 3,92 | <p>Log S = -5,04</p> <p>Solubility = 4,16e-03 mg/ml ; 9,12e-06 mol/l</p> <p>Class: Moderately Soluble</p> | <p>Log S = -5,92</p> <p>Solubility = 5,45e-04 mg/ml ; 1,21e-06 mol/l</p> <p>Class: Moderately Soluble</p> | <p>Log S = -6,92</p> <p>Solubility = 5,43e-05 mg/ml ; 1,20e-07 mol/l</p> <p>Class: Poorly Soluble</p> |
|  <p>Chemical Formula: C<sub>24</sub>H<sub>23</sub>NO<sub>7</sub><br/>Molecular Weight: 437,45</p>  | 0,42 | 5 | 7 | 0 | 107,03<br>Å <sup>2</sup> | <p>Log <math>P_{o/w}</math> (iLOGP) = 3,54</p> <p>Log <math>P_{o/w}</math> (XLOGP3) = 3,67</p> <p>Log <math>P_{o/w}</math> (WLOGP) = 3,66</p> <p>Log <math>P_{o/w}</math> (MLOGP) = 2,74</p> <p>Log <math>P_{o/w}</math> (SILICOS-IT) = 4,51</p> | 3,63 | <p>Log S = -4,83</p> <p>Solubility = 6,40e-03 mg/ml ; 1,46e-05 mol/l</p> <p>Class: Moderately Soluble</p> | <p>Log S = -5,61</p> <p>Solubility = 1,08e-03 mg/ml ; 2,47e-06 mol/l</p> <p>Class: Moderately Soluble</p> | <p>Log S = -6,53</p> <p>Solubility = 1,29e-04 mg/ml ; 2,96e-07 mol/l</p> <p>Class: Poorly Soluble</p> |

## 10. References

- [1] I. Sosič, M. Gobec, B. Brus, D. Knez, M. Živec, J. Konc, S. Lešnik, M. Ogrizek, A. Obreza, D. Žigon, D. Janežič, I. Mlinarič-Raščan and S. Gobec, *Angew Chem Int Ed Engl*, 2016, 55, 5745-5748.
- [2] A. Daina, O. Michielin, V. Zoete, *Scientific Reports*, 2017, 7, 42717.
- [3] P. Ertl, B. Rohde and P. Selzer, *Journal of Medicinal Chemistry*, 2000, 43 (20), 3714-3717.
- [4] A. Daina, O. Michielin, V. Zoete, *Journal of Chemical Information and Modeling*, 2014, 54 (12), 3284-3301.
- [5] Calculated by XLOGP program, version 3.2.2, courtesy of CCBG, Shanghai Institute of Organic Chemistry.
- [6] Method implemented from S. Wildman, G. Crippen, *Journal of Chemical Information and Modeling*, 1999, 39 (5), 868-873.
- [7] Method implemented from I. Moriguchi, S. Hirono, I. Nakagome and H. Hirano, *Chemical and Pharmaceutical Bulletin*, 1994, 42 (4), 976-978; I. Moriguchi, S. Hirono, Q. Liu, I. Nakagome and Y. Matsushita, *Chemical and Pharmaceutical Bulletin*, 1992, 40 (1), 127-130; C. Lipinski, F. Lombardo, B. Dominy and P. Feeney, *Advanced Drug Delivery Reviews*, 2001, 46 (1-3), 3-26.
- [8] Calculated by FILTER-IT program, version 1.0.2, courtesy of SILICOS-IT, <http://www.silicos-it.com>.
- [9] Consensus Log Po/w: Average of all five predictions.
- [10] Method implemented from J. Delaney JS, *Journal of Chemical Information and Modeling*, 2004, 33 (4), 1000-1005.
- [11] Solubility class: Log S scale; Insoluble < -10 < Poorly < -6 < Moderately < -4 < Soluble < -2 < Very < 0 < Highly.
- [12] Method implemented from J. Ali, P. Camilleri, M. Brown, A. Hutt and S. Kirton, *Journal of Chemical Information and Modeling*, 2012, 52 (11), 2950-2957.
- [13] Solubility class: Log S scale; Insoluble < -10 < Poorly < -6 < Moderately < -4 < Soluble < -2 < Very < 0 < Highly
- [14] Method calculated by FILTER-IT program, version 1.0.2, courtesy of SILICOS-IT, <http://www.silicos-it.com>.
- [15] Solubility class: Log S scale; Insoluble < -10 < Poorly < -6 < Moderately < -4 < Soluble < -2 < Very < 0 < Highly
